# Supplementary material for: Long-term declines in atmospheric nitrogen and sulfur deposition reduce critical loads exceedances at multiple Canadian rural sites, 2000–2018
Source: Copernicus journal article supplement (doi:10.5194/acp-22-14631-2022), 2022-11-18
Supplement: Supplementary file 1 [file acp-22-14631-2022-supplement.pdf]

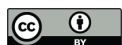

*Supplement of*

**Long-term declines in atmospheric nitrogen and sulfur deposition reduce critical loads exceedances at multiple Canadian rural sites, 2000–2018**

**Irene Cheng et al.**

*Correspondence to:* Leiming Zhang (leiming.zhang@ec.gc.ca) and Irene Cheng (irene.cheng@ec.gc.ca)

The copyright of individual parts of the supplement might differ from the article licence.

## **S1 Daily average dry deposition velocities ( $V_d$ ) of N and S species**

### **S1.1 Spatial patterns**

Daily average  $V_d$  for gas-phase compounds ( $\text{SO}_2$ ,  $\text{HNO}_3$ ) and particulate-phase compounds ( $\text{pSO}_4^{2-}$ ,  $\text{pNH}_4^+$  and  $\text{pNO}_3^-$ ) for the 2000-2018 period are summarized in Table S2. For gaseous compounds, the mean daily  $V_d$  (cm/s) among 15 CAPMoN sites were 1.2 for  $\text{HNO}_3$  and 0.46 for  $\text{SO}_2$ . For particulate sulfate ( $\text{pSO}_4^{2-}$ ), ammonium ( $\text{pNH}_4^+$ ) and nitrate ( $\text{pNO}_3^-$ ), the mean daily  $V_d$  were 0.16, 0.15 and 0.21 cm/s, respectively.  $V_d$  of N and S compounds exhibited strong variability between sites. The regions with higher  $V_d$  for N and S compounds include the west coast, southeast and Atlantic (Table S2). According to the land use data surrounding a CAPMoN site (Table S1), the west coast and Atlantic sites have higher  $V_d$  likely because of nearby land use coverage that is associated with higher  $V_d$ . For example, water surfaces and forests. In particular, evergreen needleleaf or broadleaf trees are typically associated with larger leaf area index (LAI) and hence larger  $V_d$ . Meteorological conditions also differ substantially across Canadian sites, which can drive the spatial variability in  $V_d$ .

### **S1.2 Cold vs. warm seasonal patterns**

$V_d$  of gaseous N and S compounds were slightly greater in the warm season than cold season at most of the sites based on the monthly variations in Fig. S1. This was also the case for particulate nitrate due to the higher fraction of nitrate in coarse PM during the warm season, which is based on size-fractionated measurements previously conducted at CAPMoN sites (Zhang et al., 2008). Given that  $V_d$  of coarse PM ( $\text{PM}_{2.5-10}$ ) is larger than that of fine PM ( $\text{PM}_{2.5}$ ), a higher fraction in coarse PM results in higher  $V_d$ . During the cold season, nitrate is predominantly associated with fine PM at CAPMoN sites (Zhang et al., 2008).  $V_d$  of sulfate and ammonium were slightly higher in the cold season than warm season. This pattern is likely attributed to meteorology perhaps higher wind speeds in the cold season.

### **S1.3 Long-term annual trends**

Long-term annual trends in  $V_d$  were estimated using Theil-Sen slopes of the seasonal average  $V_d$ , which have been seasonally adjusted using LOESS (locally estimated scatterplot smoothing). Statistically significant trends in  $V_d$  ( $p < 0.05$ ) are shown in Fig. S2. Among the sites, annual trends in  $V_d$  (cm/s of change per year) ranged from  $2.4\text{--}8.8 \times 10^{-3}$  for  $\text{HNO}_3$ ,  $9.0 \times 10^{-4}$  to  $5.1 \times 10^{-3}$  for  $\text{SO}_2$ ,  $3.0 \times 10^{-4}$  to  $1.0 \times 10^{-3}$  for sulfate,  $3.0\text{--}9.0 \times 10^{-4}$  for ammonium and  $2.7 \times 10^{-4}$  to  $1.5 \times 10^{-3}$  for nitrate. Overall, the increasing annual trends in  $V_d$  were very small indicating that  $V_d$  of a chemical specie stays constant over time. Small fluctuations in  $V_d$  over time reflect meteorological variability. Thus, the main factor driving the long-term annual dry deposition trends are the ambient air concentrations.

## S2 Soil critical loads (CL) calculations

Soil CL were extracted from Canada-wide maps produced following the manual on methodologies and criteria for modelling and mapping critical loads (CLRTAP, 2004), which outlines the input parameters required for the Simple Mass Balance (SMB) model. A raster-based mapping approach was taken with maps resampled and aligned to the 250 m LandGIS project grid and reprojected (where necessary) to EPSG:3347. The critical load function (Figure S9) was calculated for each map using  $CL_{max}S$  (Eq. S1),  $CL_{min}N$  (Eq. S3), and  $CL_{max}N$  (Eq. S4).

$$CL_{max}S = BC_{dep} + BC_w - Cl_{dep} - Bc_u - ANC_{le,crit} \quad (\text{Eq. S1})$$

$$\text{where } ANC_{le,crit} = -Q^{2/3} \cdot \left( 1.5 \cdot \frac{BC_{dep} + BC_w - Bc_u}{K_{gibb} \cdot (Bc/Al)_{crit}} \right) \quad (\text{Eq. S2})$$

$$CL_{min}N = N_i + N_u \quad (\text{Eq. S3})$$

$$CL_{max}N = CL_{min}N + \left( \frac{CL_{max}S}{(1-f_{de})} \right) \quad (\text{Eq. S4})$$

Base cation deposition ( $BC_{dep}$ , Eq. S1) was mapped for the country using a nationwide crustal materials map and a  $BC_{dep}$  map covering the Athabasca oil sands region scaled to CAPMoN precipitation ions data (Makar et al., 2018). The  $BC_{dep}$  map was divided by long-term normal (1980-2010) annual precipitation (McKenney et al., 2006) to model concentration. Logistic regression kriging using crustal material and long-term normal (1980-2010) annual temperature (McKenney et al., 2006) was used to create a predicted regional map based on the local base cation estimates in the Athabasca oil sands region. Since this process estimates non-marine  $BC_{dep}$ , chloride deposition ( $Cl_{dep}$ ) was not considered. The base cation ( $Ca + Mg + K + Na$ ) weathering rate ( $BC_w$ ) was estimated according to the soil type-texture approximation using continuous soil characteristics maps (absolute depth (Hengl, 2017), bulk density (Hengl, 2018c), clay content (Hengl, 2018d), sand content (Hengl, 2018b), and organic carbon (Hengl & Wheeler, 2018)) from the LandGIS project and parent material acid classification from the Soil Landscapes of Canada (SLC) v2.2 (Centre for Land and Biological Resources Research & Canada, 1996) and v.3.3 (Schut et al., 2011). Root zone was limited to a maximum of 50 cm for forests and 30 cm for other landcover types; wetlands and soils that contained >30% organic matter were removed. Soil weathering rate was temperature adjusted (Hengl, 2018a). The gibbsite equilibrium constant ( $K_{gibb}$ , Eq. S2) was assigned mid-point values from ranges suggested by CLRTAP (2004) ( $950 \text{ m}^6 \text{ eq}^{-2}$  for mineral soils;  $300 \text{ m}^6 \text{ eq}^{-2}$  for low organic matter soils;  $100 \text{ m}^6 \text{ eq}^{-2}$  for soils with some organic material;  $9.5 \text{ m}^6 \text{ eq}^{-2}$  for peaty and organic soils). Base cation uptake ( $Bc_u$ ) and nitrogen uptake ( $N_u$ ) by trees were estimated using species-specific base cation and nutrient content databases (Pardo et al., 2005; Paré et al., 2013) for bark and trunk, in combination with species and biomass maps (Beaudoin et al., 2014). Uptake maps were limited to the harvestable areas delineated in Dymond et al. (2010). A dynamic  $Bc/Al_{crit}$  (critical chemical criteria) was assigned to each raster grid using species-specific values representing a 5% growth reduction from Sverdrup and Warfvinge (1993) where available; priority was given to the species with the lowest  $Bc/Al_{crit}$ . Where species-specific information was not available or non-forested soils occurred, a value averaged to the genus or landcover type (CCRS, 2018) was used. A runoff ( $Q$ ) map was interpolated from modelled point estimates produced from the meteo-hydrological model MetHyd (Bonten et al., 2016) (detailed in Reinds et al., 2015). Landcover was used to mask out wetlands, urban areas and agricultural soils. The long-term net immobilization of N ( $N_i$ , Eq. S3) was set to  $35.714 \text{ eq ha}^{-1} \text{ yr}^{-1}$  (based on assumed  $0.5 \text{ ha N}^{-1} \text{ yr}^{-1}$ ). The combined SLC databases were used to assign the denitrification fraction ( $f_{de}$ , Eq. S4) based on drainage classes (CLRTAP, 2004).

Table S1: Description of CAPMoN sites analyzed in this study. Land use percentages within a 3 km circle of each site were estimated from MODIS.

| Site (ID)                       | Coordinates    | Province                       | Land use percentages                                                                      | Period analyzed |
|---------------------------------|----------------|--------------------------------|-------------------------------------------------------------------------------------------|-----------------|
| Saturna (SAT)                   | 48.78, -123.13 | British Columbia (BC)          | evergreen needleleaf trees (59.1%), water (27.0%), evergreen broadleaf trees (13.9%)      | 2000-2018       |
| Bratt's Lake (BRA)              | 50.2, -104.71  | Saskatchewan (SK)              | crops (100%)                                                                              | 2002-2012       |
| Experimental Lakes Area (ELA)   | 49.66, -93.73  | Ontario (ON)                   | long grass (52.4%), evergreen needleleaf trees (47.6%)                                    | 2000-2018       |
| Algoma (ALG)                    | 47.03, -84.38  | ON                             | deciduous broadleaf trees (100%)                                                          | 2000-2016       |
| Bonner Lake (BON)               | 49.39, -82.12  | ON                             | deciduous broadleaf trees (35.2%), evergreen needleleaf trees (34.4%), long grass (30.3%) | 2009-2018       |
| Longwoods (LON)                 | 42.88, -81.48  | ON                             | crops (100%)                                                                              | 2000-2018       |
| Egbert (EGB)                    | 44.23, -79.79  | ON                             | crops (80.2%), long grass (19.8%)                                                         | 2000-2018       |
| Sprucedale (SPR)                | 45.42, -79.49  | ON                             | deciduous broadleaf trees (52%), evergreen needleleaf trees (48%)                         | 2003-2018       |
| Chalk River (CHA)               | 46.06, -77.40  | ON                             | deciduous broadleaf trees (60.7%), evergreen needleleaf trees (39.3%)                     | 2000-2018       |
| Chapais (CPS)                   | 49.82, -74.98  | Quebec (QC)                    | long grass (64.4%), evergreen needleleaf trees (35.6%)                                    | 2000-2017       |
| Frelighsburg (FRE)              | 45.05, -72.86  | QC                             | deciduous broadleaf trees (63.9%), long grass (36.1%)                                     | 2002-2016       |
| Lac Edouard (LED)               | 47.68, -72.44  | QC                             | evergreen needleleaf trees (50.4%), deciduous broadleaf trees (49.6%)                     | 2002-2016       |
| Kejimikujik National Park (KEJ) | 44.43, -65.20  | Nova Scotia (NS)               | evergreen needleleaf trees (51.2%), deciduous broadleaf trees (48.8%)                     | 2000-2016       |
| Mingan (MIN)                    | 50.27, -64.23  | QC                             | water (39.8%), evergreen needleleaf trees (37.9%), long grass (22.3%)                     | 2009-2016       |
| Bay d'Espoir (BAB)              | 47.99, -55.82  | Newfoundland and Labrador (NL) | long grass (56.1%), evergreen needleleaf trees (24.4%), deciduous broadleaf trees (19.5%) | 2007-2016       |

Table S2: Modeled dry deposition velocities of N and S compounds at CAPMoN sites during 2000-2018 (mean  $\pm$  standard deviation, cm/s)

| SiteID | Region            | SO <sub>2</sub> | HNO <sub>3</sub> | pSO <sub>4</sub> <sup>2-</sup> | pNH <sub>4</sub> <sup>+</sup> | pNO <sub>3</sub> <sup>-</sup> |
|--------|-------------------|-----------------|------------------|--------------------------------|-------------------------------|-------------------------------|
| SAT    | West coast        | 0.82 $\pm$ 0.44 | 1.72 $\pm$ 0.69  | 0.19 $\pm$ 0.06                | 0.18 $\pm$ 0.06               | 0.25 $\pm$ 0.05               |
| BRA    | Prairie           | 0.47 $\pm$ 0.18 | 1.04 $\pm$ 0.32  | 0.2 $\pm$ 0.03                 | 0.19 $\pm$ 0.03               | 0.27 $\pm$ 0.08               |
| ELA    | Remote            | 0.37 $\pm$ 0.12 | 0.97 $\pm$ 0.2   | 0.13 $\pm$ 0.02                | 0.12 $\pm$ 0.02               | 0.17 $\pm$ 0.03               |
| ALG    | Greater Southeast | 0.28 $\pm$ 0.12 | 0.9 $\pm$ 0.25   | 0.11 $\pm$ 0.02                | 0.1 $\pm$ 0.02                | 0.16 $\pm$ 0.03               |
| BON    | Remote            | 0.36 $\pm$ 0.15 | 1.02 $\pm$ 0.26  | 0.13 $\pm$ 0.02                | 0.12 $\pm$ 0.02               | 0.17 $\pm$ 0.04               |
| LON    | Southeast         | 0.57 $\pm$ 0.11 | 1.2 $\pm$ 0.16   | 0.23 $\pm$ 0.04                | 0.22 $\pm$ 0.03               | 0.3 $\pm$ 0.05                |
| EGB    | Southeast         | 0.5 $\pm$ 0.11  | 1.04 $\pm$ 0.16  | 0.2 $\pm$ 0.03                 | 0.19 $\pm$ 0.03               | 0.26 $\pm$ 0.05               |
| SPR    | Greater Southeast | 0.41 $\pm$ 0.14 | 1.26 $\pm$ 0.26  | 0.13 $\pm$ 0.02                | 0.12 $\pm$ 0.02               | 0.17 $\pm$ 0.03               |
| CHA    | Greater Southeast | 0.31 $\pm$ 0.11 | 0.94 $\pm$ 0.21  | 0.11 $\pm$ 0.01                | 0.1 $\pm$ 0.01                | 0.15 $\pm$ 0.03               |
| CPS    | Remote            | 0.4 $\pm$ 0.15  | 1.01 $\pm$ 0.23  | 0.14 $\pm$ 0.02                | 0.14 $\pm$ 0.02               | 0.19 $\pm$ 0.04               |
| FRE    | Greater Southeast | 0.3 $\pm$ 0.1   | 0.78 $\pm$ 0.18  | 0.11 $\pm$ 0.01                | 0.1 $\pm$ 0.01                | 0.15 $\pm$ 0.03               |
| LED    | Remote            | 0.38 $\pm$ 0.17 | 1.14 $\pm$ 0.31  | 0.12 $\pm$ 0.02                | 0.12 $\pm$ 0.02               | 0.17 $\pm$ 0.04               |
| KEJ    | Atlantic          | 0.5 $\pm$ 0.12  | 1.46 $\pm$ 0.28  | 0.15 $\pm$ 0.03                | 0.14 $\pm$ 0.03               | 0.19 $\pm$ 0.02               |
| MIN    | Atlantic          | 0.58 $\pm$ 0.16 | 1.26 $\pm$ 0.2   | 0.21 $\pm$ 0.02                | 0.2 $\pm$ 0.02                | 0.29 $\pm$ 0.06               |
| BAB    | Atlantic          | 0.76 $\pm$ 0.21 | 1.92 $\pm$ 0.24  | 0.27 $\pm$ 0.04                | 0.26 $\pm$ 0.03               | 0.36 $\pm$ 0.05               |

Table S3: Mean and range of annual dry deposition fluxes of N and S (kg N or S/ha/yr) at CAPMoN sites

| Site ID | Period    | $\Sigma N$  | $\Sigma S$  | HNO <sub>3</sub> | pNO <sub>3</sub> <sup>-</sup> | pNH <sub>4</sub> <sup>+</sup> | SO <sub>2</sub> | pSO <sub>4</sub> <sup>2-</sup> |
|---------|-----------|-------------|-------------|------------------|-------------------------------|-------------------------------|-----------------|--------------------------------|
| SAT     | 2000-2018 | 0.74        | 1.38        | 0.55             | 0.10                          | 0.08                          | 1.28            | 0.11                           |
|         |           | 0.53 - 1.16 | 0.39 - 2.56 | 0.39 - 0.89      | 0.08 - 0.14                   | 0.05 - 0.13                   | 0.32 - 2.39     | 0.09 - 0.21                    |
| BRA     | 2002-2012 | 0.71        | 0.98        | 0.34             | 0.15                          | 0.22                          | 0.76            | 0.22                           |
|         |           | 0.54 - 0.9  | 0.75 - 1.23 | 0.26 - 0.52      | 0.11 - 0.17                   | 0.17 - 0.26                   | 0.58 - 0.98     | 0.18 - 0.25                    |
| ELA     | 2000-2018 | 0.31        | 0.28        | 0.16             | 0.05                          | 0.10                          | 0.17            | 0.11                           |
|         |           | 0.2 - 0.41  | 0.11 - 0.46 | 0.1 - 0.23       | 0.03 - 0.07                   | 0.06 - 0.13                   | 0.05 - 0.32     | 0.07 - 0.15                    |
| ALG     | 2000-2016 | 0.47        | 0.47        | 0.31             | 0.05                          | 0.11                          | 0.33            | 0.14                           |
|         |           | 0.22 - 0.82 | 0.13 - 0.91 | 0.13 - 0.58      | 0.03 - 0.07                   | 0.06 - 0.18                   | 0.07 - 0.68     | 0.06 - 0.23                    |
| BON     | 2009-2018 | 0.14        | 0.15        | 0.07             | 0.01                          | 0.05                          | 0.07            | 0.08                           |
|         |           | 0.1 - 0.18  | 0.08 - 0.24 | 0.05 - 0.09      | 0.01 - 0.02                   | 0.03 - 0.07                   | 0.02 - 0.13     | 0.05 - 0.11                    |
| LON     | 2000-2018 | 1.88        | 3.54        | 0.80             | 0.41                          | 0.67                          | 2.97            | 0.57                           |
|         |           | 1.04 - 2.87 | 0.74 - 6.92 | 0.47 - 1.39      | 0.25 - 0.65                   | 0.32 - 1.05                   | 0.49 - 6.02     | 0.24 - 0.9                     |
| EGB     | 2000-2018 | 1.36        | 2.02        | 0.62             | 0.29                          | 0.45                          | 1.62            | 0.40                           |
|         |           | 0.77 - 2.08 | 0.52 - 3.96 | 0.37 - 0.92      | 0.18 - 0.45                   | 0.22 - 0.71                   | 0.31 - 3.27     | 0.17 - 0.68                    |
| SPR     | 2003-2018 | 0.63        | 0.78        | 0.44             | 0.05                          | 0.14                          | 0.61            | 0.17                           |
|         |           | 0.33 - 1.14 | 0.2 - 1.46  | 0.22 - 0.81      | 0.04 - 0.08                   | 0.07 - 0.25                   | 0.13 - 1.2      | 0.07 - 0.31                    |
| CHA     | 2000-2018 | 0.35        | 0.57        | 0.22             | 0.03                          | 0.09                          | 0.45            | 0.13                           |
|         |           | 0.2 - 0.62  | 0.13 - 1.05 | 0.12 - 0.42      | 0.02 - 0.06                   | 0.05 - 0.16                   | 0.05 - 0.85     | 0.06 - 0.22                    |
| CPS     | 2000-2017 | 0.16        | 0.28        | 0.09             | 0.01                          | 0.06                          | 0.17            | 0.11                           |
|         |           | 0.08 - 0.25 | 0.1 - 0.48  | 0.04 - 0.14      | 0.01 - 0.02                   | 0.03 - 0.09                   | 0.05 - 0.32     | 0.06 - 0.15                    |
| FRE     | 2002-2016 | 0.62        | 0.74        | 0.38             | 0.08                          | 0.17                          | 0.57            | 0.17                           |
|         |           | 0.35 - 1.03 | 0.22 - 1.23 | 0.24 - 0.67      | 0.04 - 0.1                    | 0.07 - 0.27                   | 0.15 - 0.95     | 0.07 - 0.29                    |
| LED     | 2002-2016 | 0.32        | 0.36        | 0.22             | 0.02                          | 0.08                          | 0.24            | 0.12                           |
|         |           | 0.17 - 0.61 | 0.11 - 0.69 | 0.11 - 0.43      | 0.02 - 0.04                   | 0.04 - 0.14                   | 0.05 - 0.5      | 0.05 - 0.19                    |
| KEJ     | 2000-2016 | 0.34        | 0.51        | 0.21             | 0.04                          | 0.09                          | 0.34            | 0.16                           |
|         |           | 0.16 - 0.65 | 0.11 - 1.15 | 0.09 - 0.46      | 0.03 - 0.06                   | 0.04 - 0.14                   | 0.04 - 0.85     | 0.08 - 0.32                    |
| MIN     | 2009-2016 | 0.13        | 0.20        | 0.05             | 0.03                          | 0.05                          | 0.11            | 0.10                           |
|         |           | 0.1 - 0.15  | 0.12 - 0.27 | 0.04 - 0.06      | 0.03 - 0.04                   | 0.03 - 0.06                   | 0.05 - 0.15     | 0.11 - 0.17                    |
| BAB     | 2007-2017 | 0.18        | 0.24        | 0.09             | 0.04                          | 0.06                          | 0.10            | 0.14                           |
|         |           | 0.13 - 0.23 | 0.12 - 0.36 | 0.06 - 0.12      | 0.03 - 0.05                   | 0.04 - 0.07                   | 0.04 - 0.17     | 0.12 - 0.25                    |

Table S4: Annual percent change in dry, wet and total (dry+wet) N and S deposition at CAPMoN sites estimated from Theil-Sen's trend analysis (% change/yr). ns: trend is not statistically significant; NA: not available due to incomplete data.

| Site ID | Period    | Dry N | Dry S | Wet N | Wet S | Total N | Total S |
|---------|-----------|-------|-------|-------|-------|---------|---------|
| SAT     | 2000-2018 | -2.6  | -4.2  | ns    | -3.4  | -1.1    | -3.5    |
| BRA     | 2002-2012 | ns    | ns    | NA    | NA    | NA      | NA      |
| ELA     | 2000-2018 | -2.6  | -4.3  | -1.3  | -3.6  | -1.4    | -3.6    |
| ALG     | 2000-2016 | -3.8  | -4.8  | -2.4  | -4.3  | -2.5    | -4.4    |
| BON     | 2009-2018 | -4.0  | -7.1  | -1.4  | -3.6  | ns      | -5.4    |
| LON     | 2000-2018 | -3.9  | -5.8  | -1.8  | -4.3  | -2.2    | -4.7    |
| EGB     | 2000-2018 | -3.6  | -5.4  | -1.4  | -4.5  | -2.0    | -4.6    |
| SPR     | 2003-2018 | -4.6  | -5.9  | -1.9  | -4.9  | -2.2    | -5.0    |
| CHA     | 2000-2018 | -4.0  | -5.1  | -2.2  | -4.5  | -2.3    | -4.5    |
| CPS     | 2000-2017 | -3.2  | -4.5  | -3.1  | -5.0  | -3.3    | -4.9    |
| FRE     | 2002-2016 | -4.4  | -6.1  | -2.1  | -5.0  | -2.0    | -5.3    |
| LED     | 2002-2016 | -4.8  | -5.9  | -2.2  | -4.2  | -2.7    | -4.7    |
| KEJ     | 2000-2016 | -5.0  | -6.6  | -2.1  | -4.3  | -2.6    | -4.8    |
| MIN     | 2009-2016 | ns    | ns    | -2.9  | -4.6  | ns      | -5.6    |
| BAB     | 2007-2016 | -3.7  | -6.0  | -2.2  | -4.2  | ns      | -6.6    |

Table S5: Comparison of rates of change between annual dry and wet deposition fluxes of N and S and reduced and oxidized N (kg N or S/ha/yr) at CAPMoN sites based on Theil-Sen slopes (statistically significant at  $p < 0.05$ ). NA: not available due to incomplete data; ns: trend is not statistically significant. Note: Nitrogen and reduced N dry deposition exclude dry deposition of  $\text{NH}_3$  and some oxidized nitrogen species.

| Site ID | Reduced N |         | Oxidized N |         | Sulfur  |         | Nitrogen |         | Percentage of total deposition<br>(% increase/yr) |        |            |
|---------|-----------|---------|------------|---------|---------|---------|----------|---------|---------------------------------------------------|--------|------------|
|         | dry dep   | wet dep | dry dep    | wet dep | dry dep | wet dep | dry dep  | wet dep | %wet N                                            | %wet S | %reduced N |
| SAT     | -0.004    | ns      | -0.02      | ns      | -0.09   | -0.05   | -0.02    | ns      | 0.5%                                              | 0.8%   | 0.3%       |
| BRA     | NA        | NA      | NA         | NA      | NA      | NA      | NA       | NA      | NA                                                | NA     | NA         |
| ELA     | -0.003    | ns      | -0.01      | -0.05   | -0.02   | -0.07   | -0.01    | -0.05   | 0.1%                                              | 0.3%   | 0.6%       |
| ALG     | -0.005    | -0.067  | -0.02      | -0.16   | -0.04   | -0.25   | -0.03    | -0.21   | 0.2%                                              | 0.2%   | 0.8%       |
| BON     | -0.003    | ns      | -0.004     | ns      | -0.02   | -0.07   | -0.01    | ns      | 0.3%                                              | 0.5%   | ns         |
| LON     | -0.043    | ns      | -0.06      | -0.15   | -0.35   | -0.32   | -0.11    | -0.15   | 0.6%                                              | 1.3%   | 0.9%       |
| EGB     | -0.027    | ns      | -0.04      | -0.11   | -0.20   | -0.21   | -0.07    | -0.09   | 0.5%                                              | 0.9%   | 1.0%       |
| SPR     | -0.009    | ns      | -0.03      | -0.14   | -0.08   | -0.29   | -0.04    | -0.16   | 0.3%                                              | 0.5%   | 1.0%       |
| CHA     | -0.005    | ns      | -0.01      | -0.11   | -0.05   | -0.22   | -0.02    | -0.13   | 0.2%                                              | ns     | 0.8%       |
| CPS     | -0.002    | -0.038  | -0.005     | -0.08   | -0.02   | -0.15   | -0.01    | -0.12   | ns                                                | ns     | 0.6%       |
| FRE     | -0.011    | ns      | -0.03      | -0.15   | -0.07   | -0.31   | -0.04    | -0.16   | 0.4%                                              | 0.4%   | 1.3%       |
| LED     | -0.004    | ns      | -0.02      | -0.09   | -0.03   | -0.14   | -0.02    | -0.10   | 0.3%                                              | 0.5%   | 1.0%       |
| KEJ     | -0.005    | ns      | -0.02      | -0.06   | -0.05   | -0.14   | -0.03    | -0.08   | 0.4%                                              | 0.8%   | 0.6%       |
| MIN     | -0.003    | ns      | ns         | ns      | ns      | -0.10   | ns       | ns      | ns                                                | ns     | ns         |
| BAB     | -0.003    | ns      | -0.01      | -0.04   | -0.02   | -0.10   | -0.01    | -0.05   | ns                                                | ns     | ns         |



Table S6: Ratio of % change in oxidized N deposition to % change in NO<sub>x</sub> emissions in back trajectory determined source regions. Slope % based on Theil-Sen's analysis of long term trends (% change per year). ns: trend is not significant; NA: not available.

| Emissions → |            |         | NO <sub>x</sub> Can east | NO <sub>x</sub> Can west | NO <sub>x</sub> US east | NO <sub>x</sub> US west |
|-------------|------------|---------|--------------------------|--------------------------|-------------------------|-------------------------|
| Site ID     | Deposition | Slope % | -3.80                    | -1.20                    | -3.92                   | -3.24                   |
| SAT         | dry        | -2.6    | 69%                      | 217%                     | 66%                     | 0.80                    |
| BRA         | dry        | ns      | NA                       | NA                       | NA                      | NA                      |
| ELA         | dry        | -2.6    | 69%                      | 218%                     | 67%                     | 81%                     |
| ALG         | dry        | -3.9    | 103%                     | 326%                     | 100%                    | 121%                    |
| BON         | dry        | -3.9    | 102%                     | 323%                     | 99%                     | 119%                    |
| LON         | dry        | -3.6    | 96%                      | 303%                     | 93%                     | 112%                    |
| EGB         | dry        | -3.5    | 92%                      | 291%                     | 89%                     | 108%                    |
| SPR         | dry        | -4.6    | 122%                     | 387%                     | 118%                    | 143%                    |
| CHA         | dry        | -4.1    | 107%                     | 338%                     | 103%                    | 125%                    |
| CPS         | dry        | -3.4    | 91%                      | 288%                     | 88%                     | 106%                    |
| FRE         | dry        | -4.4    | 116%                     | 367%                     | 112%                    | 136%                    |
| LED         | dry        | -5.1    | 133%                     | 421%                     | 129%                    | 156%                    |
| KEJ         | dry        | -5.4    | 142%                     | 450%                     | 138%                    | 166%                    |
| MIN         | dry        | ns      | NA                       | NA                       | NA                      | NA                      |
| BAB         | dry        | -3.7    | 97%                      | 307%                     | 94%                     | 114%                    |
| SAT         | wet        | ns      | NA                       | NA                       | NA                      | NA                      |
| BRA         | wet        | ns      | NA                       | NA                       | NA                      | NA                      |
| ELA         | wet        | -2.5    | 67%                      | 213%                     | 65%                     | 79%                     |
| ALG         | wet        | -3.4    | 90%                      | 284%                     | 87%                     | 105%                    |
| BON         | wet        | ns      | NA                       | NA                       | NA                      | NA                      |
| LON         | wet        | -3.2    | 84%                      | 267%                     | 82%                     | 99%                     |
| EGB         | wet        | -3.1    | 82%                      | 260%                     | 79%                     | 96%                     |
| SPR         | wet        | -3.4    | 89%                      | 283%                     | 87%                     | 105%                    |
| CHA         | wet        | -3.1    | 82%                      | 261%                     | 80%                     | 96%                     |
| CPS         | wet        | -3.8    | 100%                     | 318%                     | 97%                     | 118%                    |
| FRE         | wet        | -3.7    | 96%                      | 305%                     | 93%                     | 113%                    |
| LED         | wet        | -3.6    | 94%                      | 298%                     | 91%                     | 110%                    |
| KEJ         | wet        | -2.8    | 72%                      | 230%                     | 70%                     | 85%                     |
| MIN         | wet        | ns      | NA                       | NA                       | NA                      | NA                      |
| BAB         | wet        | ns      | NA                       | NA                       | NA                      | NA                      |
| SAT         | Total      | -1.4    | 36%                      | 113%                     | 35%                     | 42%                     |
| BRA         | Total      | ns      | NA                       | NA                       | NA                      | NA                      |
| ELA         | Total      | -2.5    | 66%                      | 208%                     | 64%                     | 77%                     |
| ALG         | Total      | -3.5    | 92%                      | 292%                     | 89%                     | 108%                    |
| BON         | Total      | ns      | NA                       | NA                       | NA                      | NA                      |
| LON         | Total      | -3.3    | 87%                      | 275%                     | 84%                     | 101%                    |
| EGB         | Total      | -3.2    | 85%                      | 270%                     | 83%                     | 100%                    |
| SPR         | Total      | -3.6    | 93%                      | 296%                     | 91%                     | 109%                    |
| CHA         | Total      | -3.1    | 83%                      | 263%                     | 80%                     | 97%                     |
| CPS         | Total      | -4.0    | 105%                     | 334%                     | 102%                    | 123%                    |
| FRE         | Total      | -3.4    | 89%                      | 283%                     | 87%                     | 105%                    |
| LED         | Total      | -3.8    | 101%                     | 320%                     | 98%                     | 118%                    |
| KEJ         | Total      | -3.3    | 87%                      | 275%                     | 84%                     | 102%                    |
| MIN         | Total      | ns      | NA                       | NA                       | NA                      | NA                      |
| BAB         | Total      | ns      | NA                       | NA                       | NA                      | NA                      |

Table S7: Ratio of % change in reduced N deposition to % change in NH<sub>3</sub> emissions in back trajectory determined source regions. Slope % based on Theil-Sen's analysis of long term trends (% change per year). ns: trend is not significant; NA: not available.

| Emissions → |            |         | NH <sub>3</sub> Can east | NH <sub>3</sub> Can west | NH <sub>3</sub> US east | NH <sub>3</sub> US west |
|-------------|------------|---------|--------------------------|--------------------------|-------------------------|-------------------------|
| Site ID     | Deposition | Slope % | -1.00                    | 0.43                     | ns                      | 3.40                    |
| SAT         | dry        | -3.4    | 337%                     | -787%                    | NA                      | -99%                    |
| BRA         | dry        | ns      | NA                       | NA                       | NA                      | NA                      |
| ELA         | dry        | -2.7    | 266%                     | -622%                    | NA                      | -79%                    |
| ALG         | dry        | -3.3    | 329%                     | -767%                    | NA                      | -97%                    |
| BON         | dry        | -5.1    | 508%                     | -1186%                   | NA                      | -150%                   |
| LON         | dry        | -4.1    | 410%                     | -957%                    | NA                      | -121%                   |
| EGB         | dry        | -3.9    | 387%                     | -902%                    | NA                      | -114%                   |
| SPR         | dry        | -4.3    | 431%                     | -1006%                   | NA                      | -127%                   |
| CHA         | dry        | -3.7    | 372%                     | -868%                    | NA                      | -110%                   |
| CPS         | dry        | -2.8    | 276%                     | -644%                    | NA                      | -81%                    |
| FRE         | dry        | -4.7    | 473%                     | -1104%                   | NA                      | -139%                   |
| LED         | dry        | -3.8    | 380%                     | -887%                    | NA                      | -112%                   |
| KEJ         | dry        | -4.2    | 414%                     | -967%                    | NA                      | -122%                   |
| MIN         | dry        | -4.9    | 491%                     | -1145%                   | NA                      | -145%                   |
| BAB         | dry        | -4.4    | 440%                     | -1026%                   | NA                      | -130%                   |
| SAT         | wet        | ns      | NA                       | NA                       | NA                      | NA                      |
| BRA         | wet        | ns      | NA                       | NA                       | NA                      | NA                      |
| ELA         | wet        | ns      | NA                       | NA                       | NA                      | NA                      |
| ALG         | wet        | -1.5    | 153%                     | -358%                    | NA                      | -45%                    |
| BON         | wet        | ns      | NA                       | NA                       | NA                      | NA                      |
| LON         | wet        | ns      | NA                       | NA                       | NA                      | NA                      |
| EGB         | wet        | ns      | NA                       | NA                       | NA                      | NA                      |
| SPR         | wet        | ns      | NA                       | NA                       | NA                      | NA                      |
| CHA         | wet        | ns      | NA                       | NA                       | NA                      | NA                      |
| CPS         | wet        | -2.3    | 225%                     | -524%                    | NA                      | -66%                    |
| FRE         | wet        | ns      | NA                       | NA                       | NA                      | NA                      |
| LED         | wet        | ns      | NA                       | NA                       | NA                      | NA                      |
| KEJ         | wet        | ns      | NA                       | NA                       | NA                      | NA                      |
| MIN         | wet        | ns      | NA                       | NA                       | NA                      | NA                      |
| BAB         | wet        | ns      | NA                       | NA                       | NA                      | NA                      |
| SAT         | Total      | ns      | NA                       | NA                       | NA                      | NA                      |
| BRA         | Total      | ns      | NA                       | NA                       | NA                      | NA                      |
| ELA         | Total      | ns      | NA                       | NA                       | NA                      | NA                      |
| ALG         | Total      | -1.6    | 158%                     | -370%                    | NA                      | -47%                    |
| BON         | Total      | ns      | NA                       | NA                       | NA                      | NA                      |
| LON         | Total      | ns      | NA                       | NA                       | NA                      | NA                      |
| EGB         | Total      | ns      | NA                       | NA                       | NA                      | NA                      |
| SPR         | Total      | ns      | NA                       | NA                       | NA                      | NA                      |
| CHA         | Total      | -1.3    | 132%                     | -309%                    | NA                      | -39%                    |
| CPS         | Total      | -2.4    | 237%                     | -553%                    | NA                      | -70%                    |
| FRE         | Total      | ns      | NA                       | NA                       | NA                      | NA                      |
| LED         | Total      | ns      | NA                       | NA                       | NA                      | NA                      |
| KEJ         | Total      | ns      | NA                       | NA                       | NA                      | NA                      |
| MIN         | Total      | ns      | NA                       | NA                       | NA                      | NA                      |
| BAB         | Total      | ns      | NA                       | NA                       | NA                      | NA                      |

Table S8: Ratio of % change in S deposition to % change in SO<sub>2</sub> or SO<sub>x</sub> emissions in back trajectory determined source regions. Slope % based on Theil-Sen's analysis of long term trends (% change per year). ns: trend is not significant; NA: not available.

| Emissions → |            |         | SO <sub>2</sub> US east | SO <sub>2</sub> US west | SO <sub>x</sub> Can east | SO <sub>x</sub> Can west |
|-------------|------------|---------|-------------------------|-------------------------|--------------------------|--------------------------|
| Site ID     | Deposition | Slope % | -5.27                   | -4.84                   | -4.95                    | -2.36                    |
| SAT         | dry        | -4.2    | 79%                     | 87%                     | 85%                      | 177%                     |
| BRA         | dry        | ns      | NA                      | NA                      | NA                       | NA                       |
| ELA         | dry        | -4.3    | 81%                     | 89%                     | 87%                      | 182%                     |
| ALG         | dry        | -4.8    | 91%                     | 99%                     | 97%                      | 203%                     |
| BON         | dry        | -7.1    | 134%                    | 146%                    | 143%                     | 300%                     |
| LON         | dry        | -5.8    | 111%                    | 121%                    | 118%                     | 247%                     |
| EGB         | dry        | -5.4    | 103%                    | 113%                    | 110%                     | 231%                     |
| SPR         | dry        | -5.9    | 111%                    | 121%                    | 118%                     | 248%                     |
| CHA         | dry        | -5.1    | 97%                     | 106%                    | 104%                     | 218%                     |
| CPS         | dry        | -4.5    | 86%                     | 94%                     | 92%                      | 192%                     |
| FRE         | dry        | -6.1    | 116%                    | 126%                    | 123%                     | 258%                     |
| LED         | dry        | -5.9    | 113%                    | 123%                    | 120%                     | 252%                     |
| KEJ         | dry        | -6.6    | 124%                    | 136%                    | 133%                     | 278%                     |
| MIN         | dry        | ns      | NA                      | NA                      | NA                       | NA                       |
| BAB         | dry        | -6.0    | 114%                    | 125%                    | 122%                     | 256%                     |
| SAT         | wet        | -3.4    | 64%                     | 69%                     | 68%                      | 142%                     |
| BRA         | wet        | ns      | NA                      | NA                      | NA                       | NA                       |
| ELA         | wet        | -3.6    | 69%                     | 75%                     | 73%                      | 154%                     |
| ALG         | wet        | -4.3    | 82%                     | 90%                     | 88%                      | 184%                     |
| BON         | wet        | -4.8    | 91%                     | 99%                     | 97%                      | 202%                     |
| LON         | wet        | -4.3    | 81%                     | 89%                     | 87%                      | 181%                     |
| EGB         | wet        | -4.5    | 85%                     | 93%                     | 91%                      | 190%                     |
| SPR         | wet        | -4.9    | 92%                     | 101%                    | 98%                      | 206%                     |
| CHA         | wet        | -4.5    | 84%                     | 92%                     | 90%                      | 189%                     |
| CPS         | wet        | -5.0    | 95%                     | 104%                    | 102%                     | 213%                     |
| FRE         | wet        | -5.0    | 95%                     | 103%                    | 101%                     | 212%                     |
| LED         | wet        | -4.2    | 81%                     | 88%                     | 86%                      | 180%                     |
| KEJ         | wet        | -4.3    | 82%                     | 89%                     | 88%                      | 183%                     |
| MIN         | wet        | -5.6    | 106%                    | 116%                    | 113%                     | 238%                     |
| BAB         | wet        | -6.1    | 115%                    | 126%                    | 123%                     | 257%                     |
| SAT         | Total      | -3.5    | 67%                     | 73%                     | 72%                      | 150%                     |
| BRA         | Total      | ns      | NA                      | NA                      | NA                       | NA                       |
| ELA         | Total      | -3.6    | 68%                     | 74%                     | 72%                      | 151%                     |
| ALG         | Total      | -4.4    | 84%                     | 91%                     | 89%                      | 187%                     |
| BON         | Total      | -5.4    | 102%                    | 111%                    | 109%                     | 228%                     |
| LON         | Total      | -4.7    | 88%                     | 96%                     | 94%                      | 197%                     |
| EGB         | Total      | -4.6    | 87%                     | 95%                     | 93%                      | 195%                     |
| SPR         | Total      | -5.0    | 96%                     | 104%                    | 102%                     | 214%                     |
| CHA         | Total      | -4.5    | 86%                     | 94%                     | 91%                      | 192%                     |
| CPS         | Total      | -4.9    | 92%                     | 100%                    | 98%                      | 206%                     |
| FRE         | Total      | -5.3    | 100%                    | 110%                    | 107%                     | 224%                     |
| LED         | Total      | -4.7    | 89%                     | 97%                     | 94%                      | 198%                     |
| KEJ         | Total      | -4.8    | 91%                     | 99%                     | 97%                      | 203%                     |
| MIN         | Total      | -5.6    | 107%                    | 117%                    | 114%                     | 239%                     |
| BAB         | Total      | -6.6    | 125%                    | 136%                    | 133%                     | 279%                     |

Table S9: Critical loads (CL) of acidity for a subset of lakes near CAPMoN sites during 2000-2018. Ions are water chemistry mean concentrations. DOC: mean dissolved organic carbon concentration in lakes; Q: mean runoff rate.

| SiteID           | Number of lakes | Ca <sup>2+</sup> (mg/L) | Mg <sup>2+</sup> (mg/L) | Na <sup>+</sup> (mg/L) | K <sup>+</sup> (mg/L) | SO <sub>4</sub> <sup>2-</sup> (mg/L) | Cl <sup>-</sup> (mg/L) | DOC (mg/L) | Q (m/yr) | CL (eq/ha/yr) |
|------------------|-----------------|-------------------------|-------------------------|------------------------|-----------------------|--------------------------------------|------------------------|------------|----------|---------------|
| KEJ <sup>1</sup> | 8               | 0.69                    | 0.40                    | 3.15                   | 0.29                  | 1.47                                 | 4.52                   | 8.75       | 1.00     | 308           |
| ELA <sup>2</sup> | 5               | 2.08                    | 0.62                    | 0.73                   | 0.35                  | 1.94                                 | 0.20                   | 6.90       | 0.25     | 388           |
| BAB <sup>1</sup> | 7               | 1.35                    | 0.39                    | 2.48                   | 0.34                  | 0.76                                 | 3.33                   | 9.27       | 0.82     | 576           |
| LED <sup>3</sup> | 6               | 3.64                    | 0.40                    | 0.53                   | 0.19                  | 3.95                                 | 0.24                   | 4.05       | 0.70     | 1357          |
| ALG <sup>4</sup> | 5               | 3.42                    | 0.38                    | 0.57                   | 0.17                  | 3.78                                 | 0.23                   | 6.80       | 0.85     | 1460          |

<sup>1</sup>Maritime Lakes: <https://data-donnees.ec.gc.ca/data/substances/monitor/national-long-term-water-quality-monitoring-data/maritime-coastal-basin-long-term-water-quality-monitoring-data/?lang=en>

<sup>2</sup>Experimental Lakes Area: <https://www.iisd.org/ela/science-data/our-data/data-requests/>

<sup>3</sup>Quebec Lakes: data available upon request to [Daniel.Houle@ec.gc.ca](mailto:Daniel.Houle@ec.gc.ca)

<sup>4</sup>Turkey Lakes Watershed Study: <https://open.canada.ca/data/en/dataset/f9e1595d-27bb-4a6a-b94d-6b9bed7db263>

Table S10: Critical loads (CL) of acidity for soils near CAPMoN sites (eq/ha/yr), during 2000-2018. Source: refer to Section S2 Soil critical loads (CL) calculations.

| SiteID | CL <sub>maxS</sub> | CL <sub>maxN</sub> | CL <sub>minN</sub> |
|--------|--------------------|--------------------|--------------------|
| BAB    | 209                | 398                | 74                 |
| MIN    | 371                | 987                | 75                 |
| CPS    | 416                | 579                | 86                 |
| LED    | 459                | 578                | 89                 |
| ELA    | 540                | 829                | 85                 |
| CHA    | 593                | 760                | 92                 |
| ALG    | 598                | 998                | 127                |
| SPR    | 603                | 799                | 101                |
| KEJ    | 717                | 928                | 36                 |
| SAT    | 839                | 1076               | 36                 |
| BON    | 909                | 2589               | 74                 |
| EGB    | 1287               | 1719               | 36                 |
| FRE    | 1744               | 1314               | 36                 |
| LON    | 2936               | 1612               | 36                 |

Table S11: Soil and lake CL exceedances (eq/ha/yr) near CAPMoN sites after including dry deposition of non-routine N species ( $\text{NH}_3$ ,  $\text{NO}_2$  and unknown  $\text{NO}_y$ ). Positive exceedances indicate total acidic deposition exceeded CL, whereas negative exceedances indicate total acidic deposition was below CL. Routine N refers to the exceedance estimated using the total deposition from routinely-monitored N species (dry deposition of  $\text{HNO}_3$ ,  $\text{pNO}_3^-$  and  $\text{pNH}_4^+$ ; wet deposition of  $\text{NO}_3^-$  and  $\text{NH}_4^+$ ). Non-routine N species were measured at selected CAPMoN sites during 2002-2005 (Zhang et al., 2009) and at EGB in 2010 (this study). Parameters for deriving soil CL are detailed in Section S2 Soil critical loads (CL) calculations. The sources of the water quality data are available in the Table S9 footnotes.

| SiteID | Year | Soil                      |           | Lake                      |           |
|--------|------|---------------------------|-----------|---------------------------|-----------|
|        |      | Non-routine and routine N | Routine N | Non-routine and routine N | Routine N |
| ALG    | 2003 | 178.5                     | 158.6     | -412.8                    | -438.0    |
| CHA    | 2004 | 2.7                       | -58.3     | NA                        | NA        |
| EGB    | 2002 | -203.0                    | -369.6    | NA                        | NA        |
| EGB    | 2010 | -695.2                    | -885.5    | NA                        | NA        |
| FRE    | 2002 | -275.0                    | -353.5    | NA                        | NA        |
| KEJ    | 2002 | -175.8                    | -223.2    | 320.9                     | 297.1     |
| LED    | 2003 | -1.6                      | -32.0     | -795.3                    | -826.7    |
| SPR    | 2004 | 230.0                     | 205.8     | NA                        | NA        |

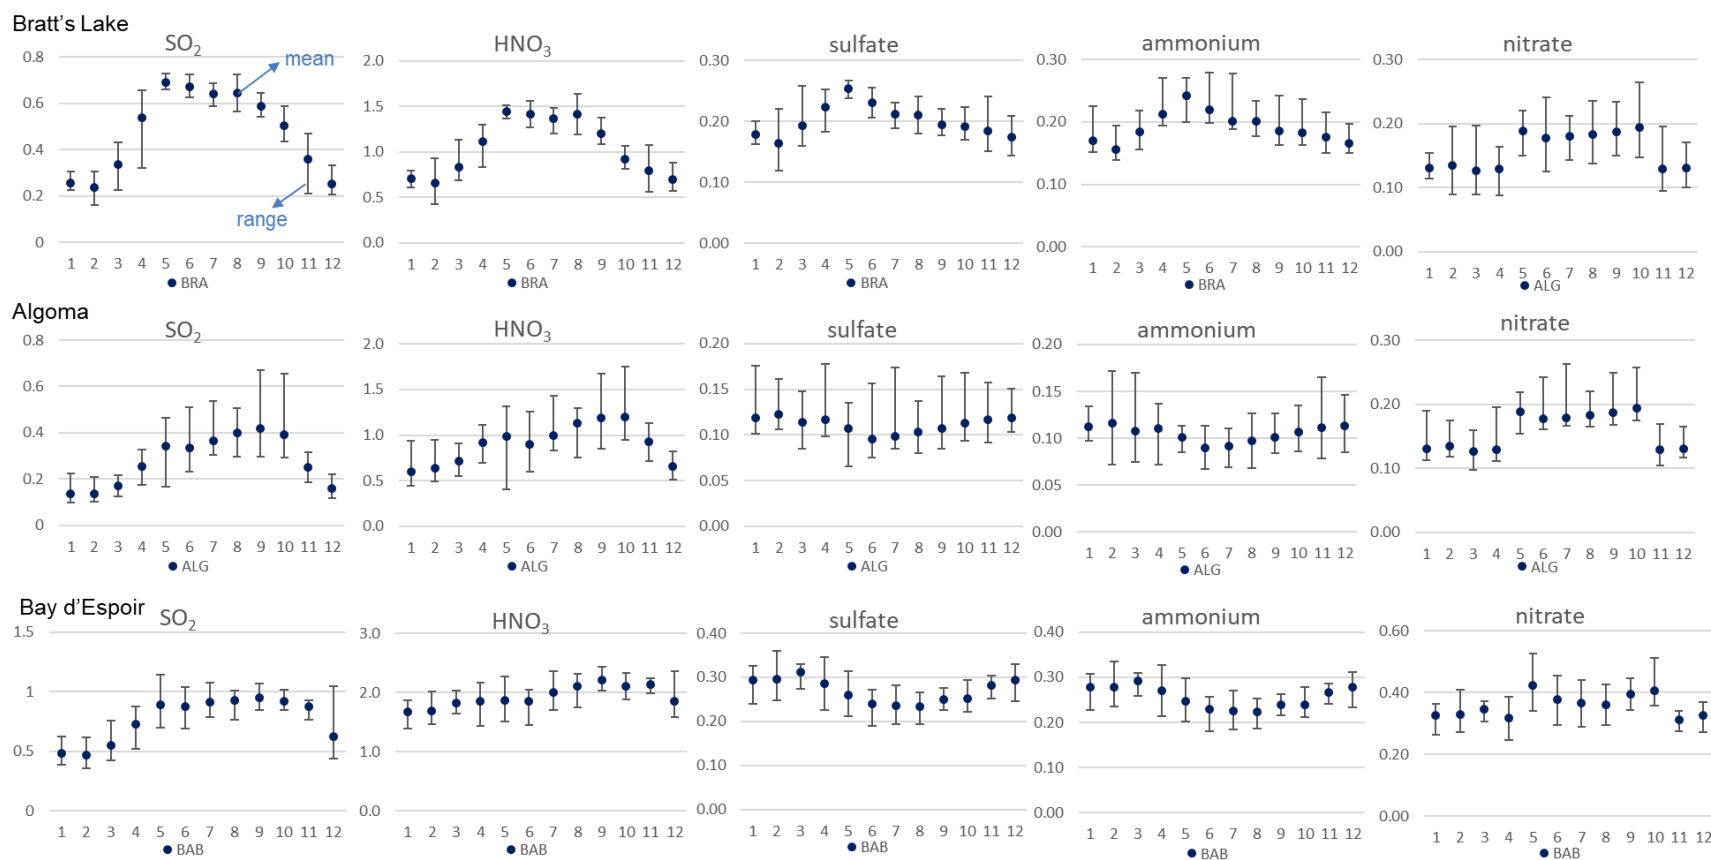

Figure S1: Monthly variation in dry deposition velocities ( $V_d$ , cm/s) of N and S species at CAPMoN sites during 2000-2018 period. Range is the annual variability in monthly  $V_d$ .

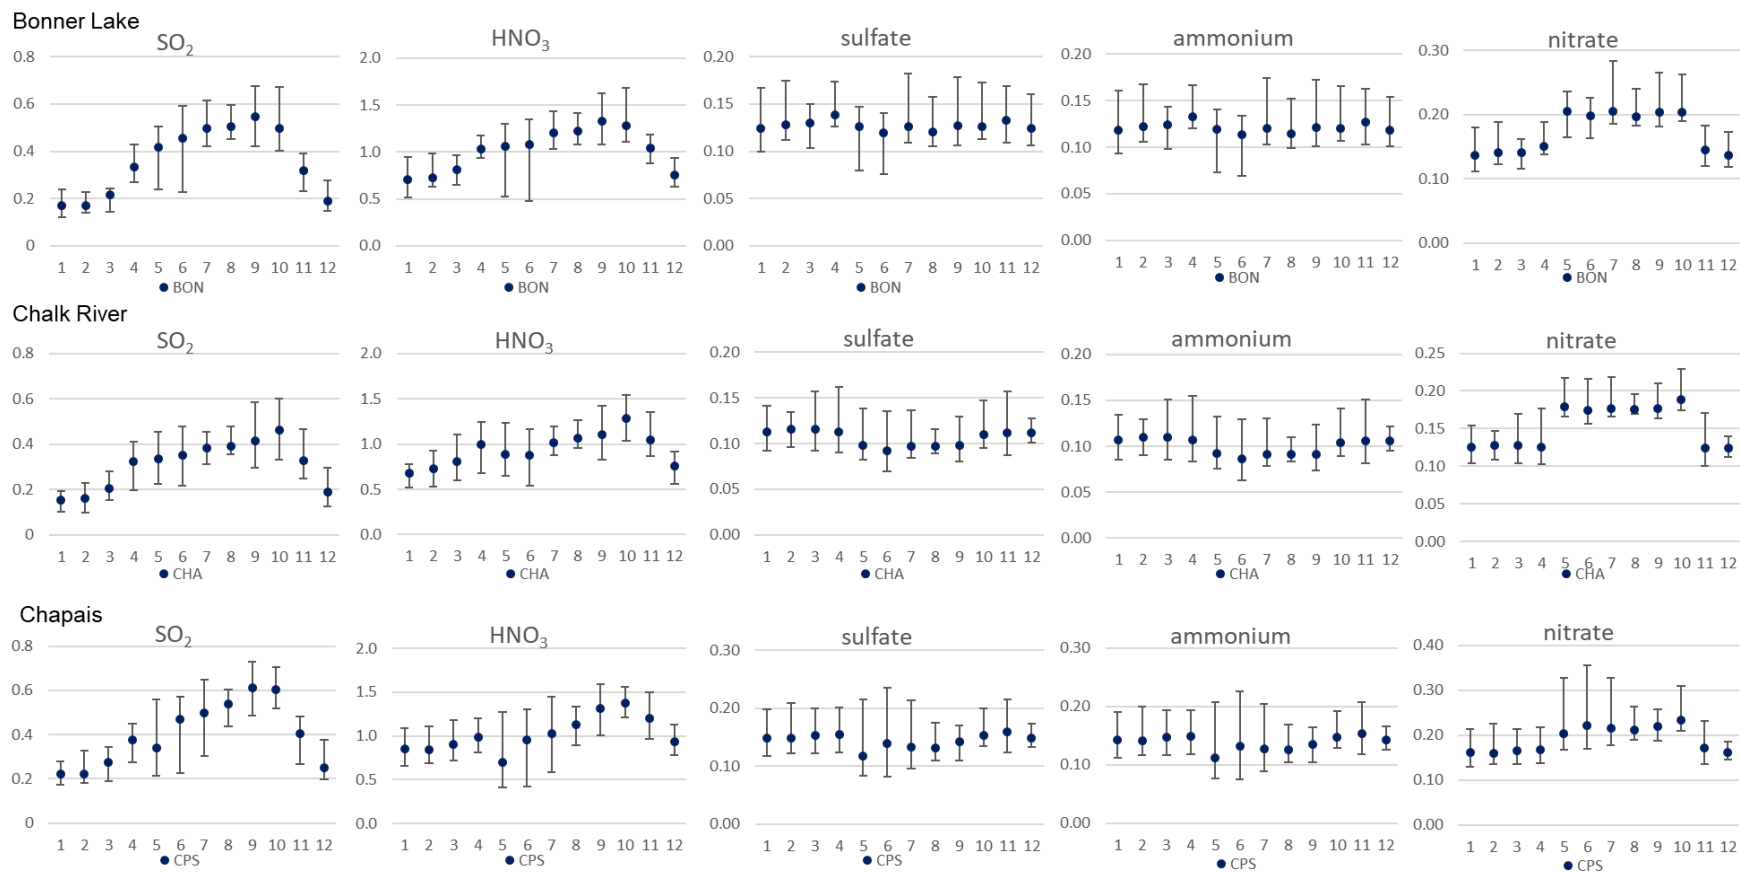

Figure S1 con't.

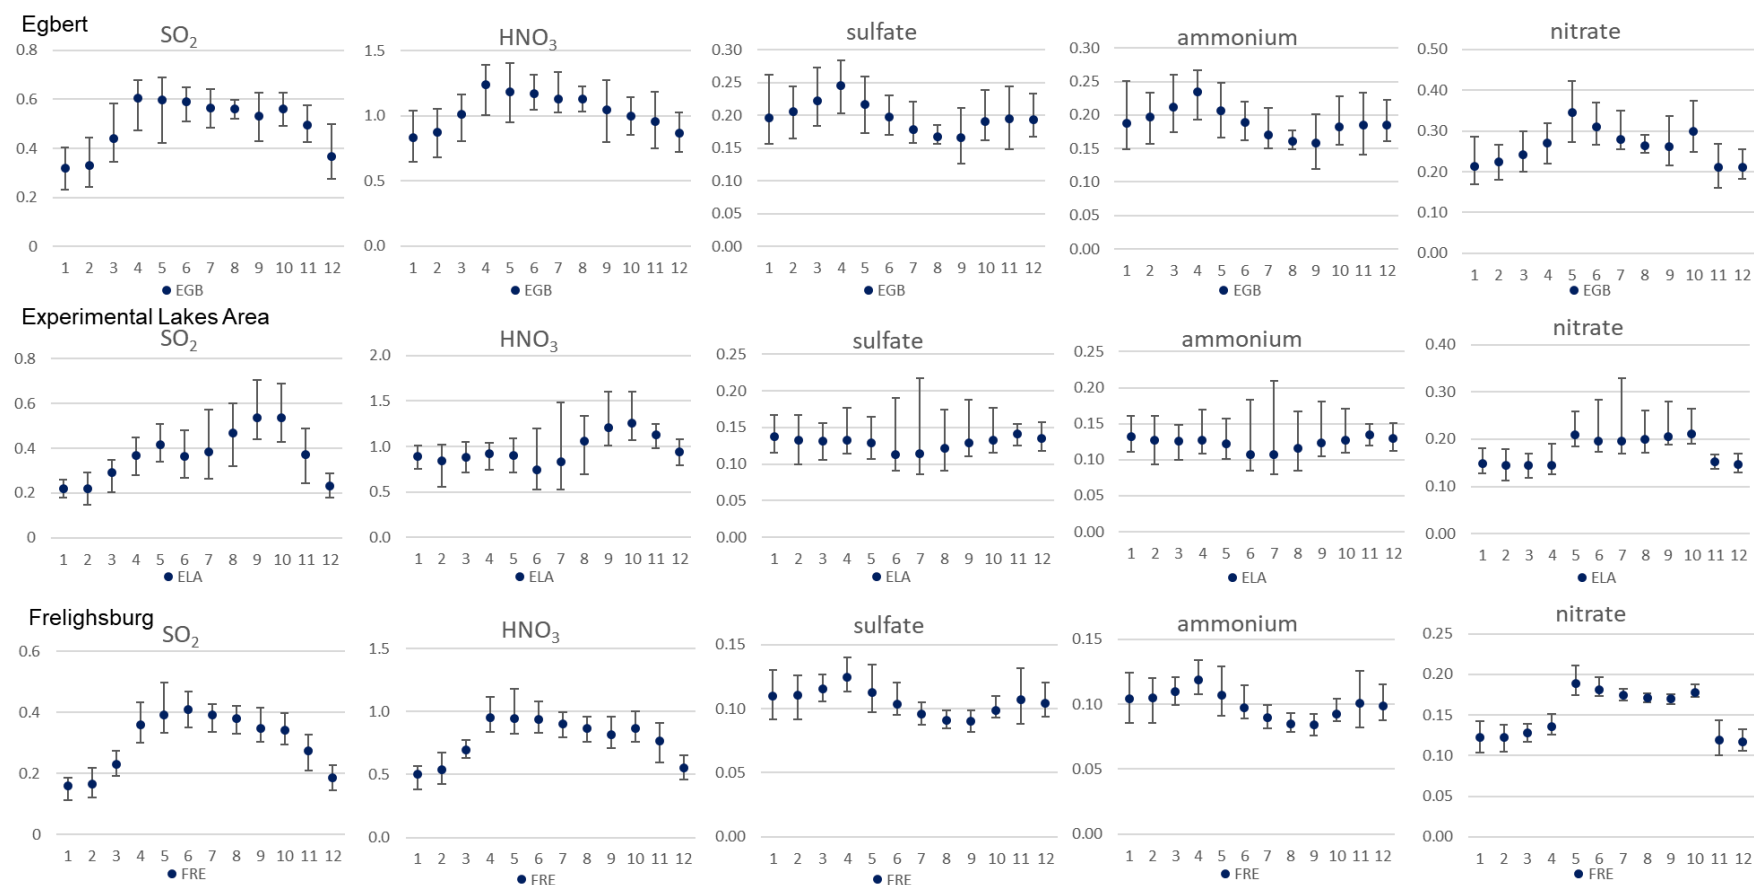

Figure S1 con't.



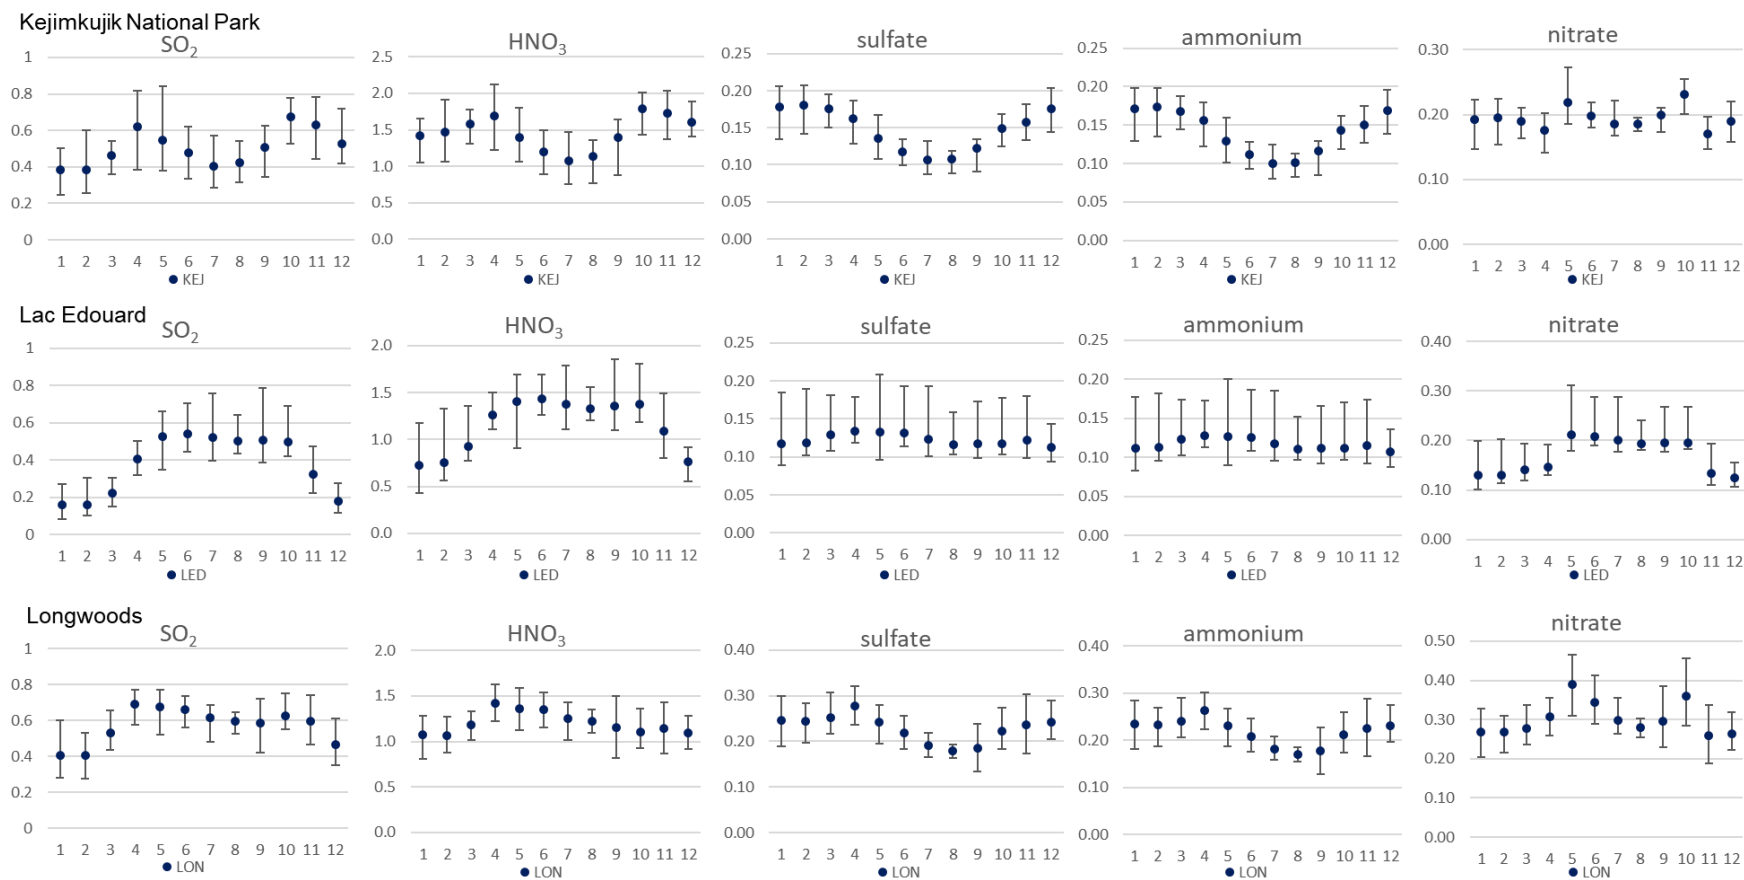

Figure S1 con't.

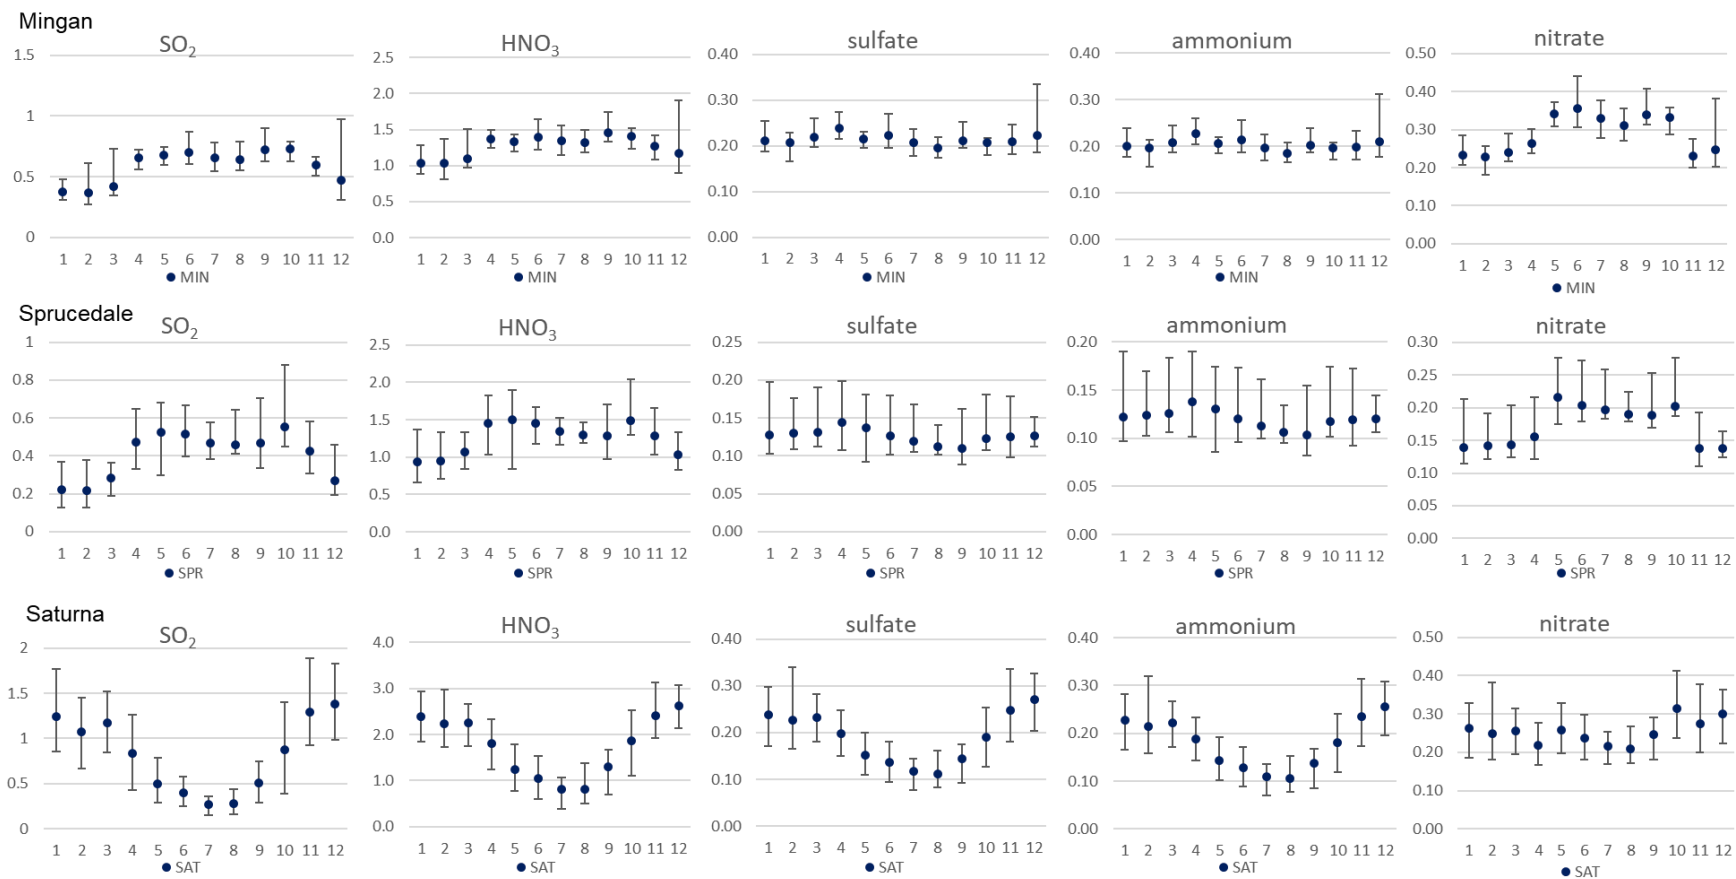

Figure S1 con't.

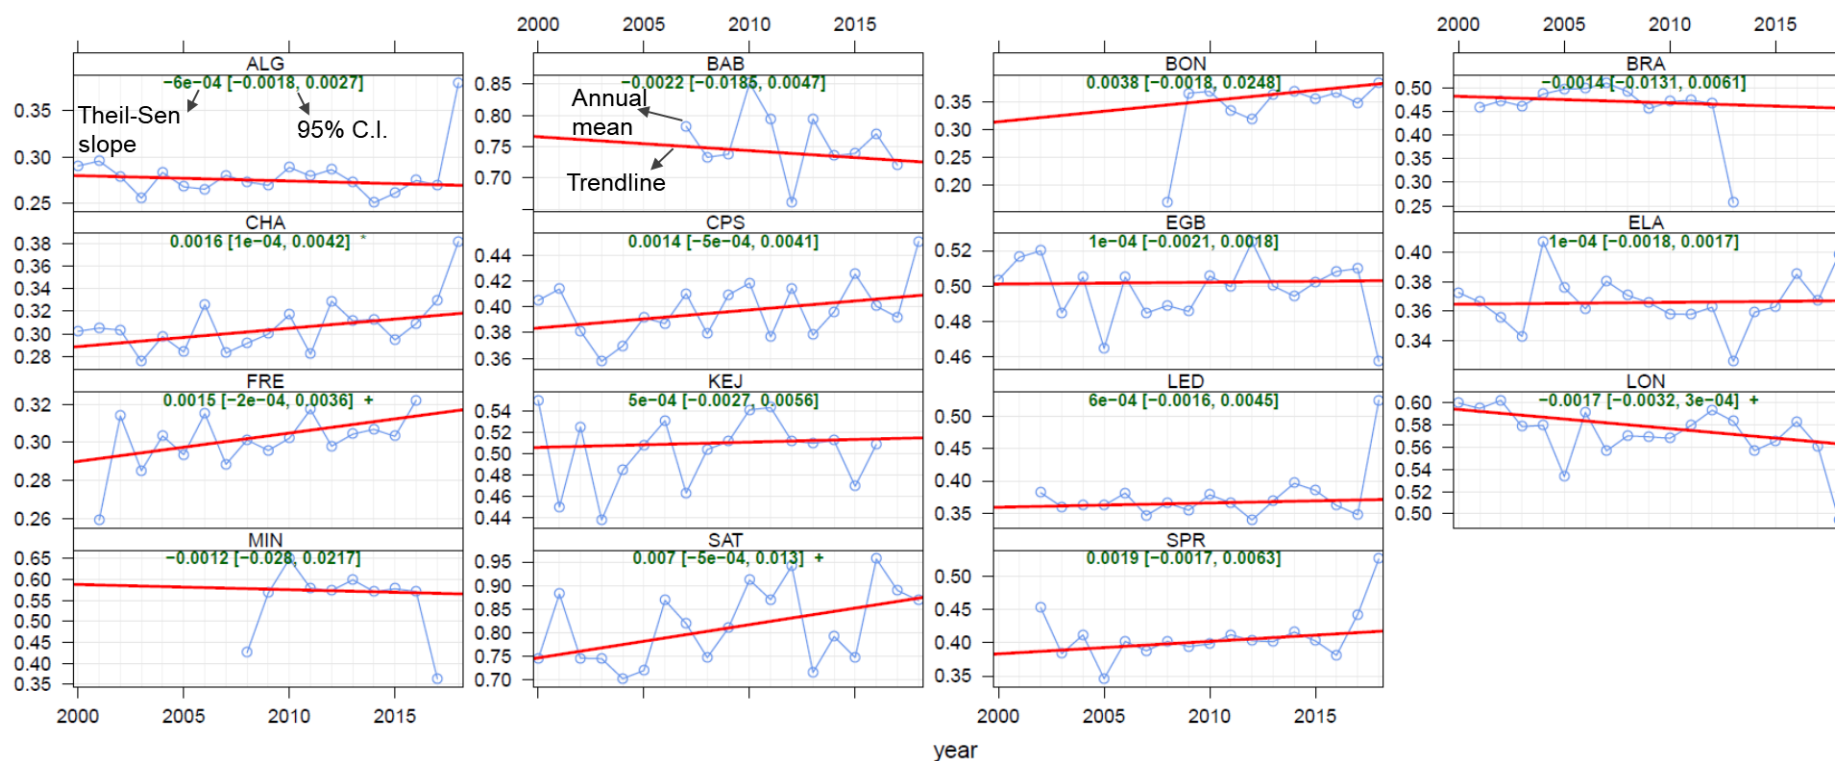

Figure S2: Long term trends in annual  $V_d$  of N and S species at CAPMoN sites.  $V_d$  of  $\text{SO}_2$  shown above. Theil-Sen slope: change in annual  $V_d$  (cm/s per year). 95% C.I.: confidence interval of the slope; + symbol indicates  $p < 0.1$ ; \* symbol indicates  $p < 0.05$  or statistically significant trend; no symbol indicates trend is not statistically significant.

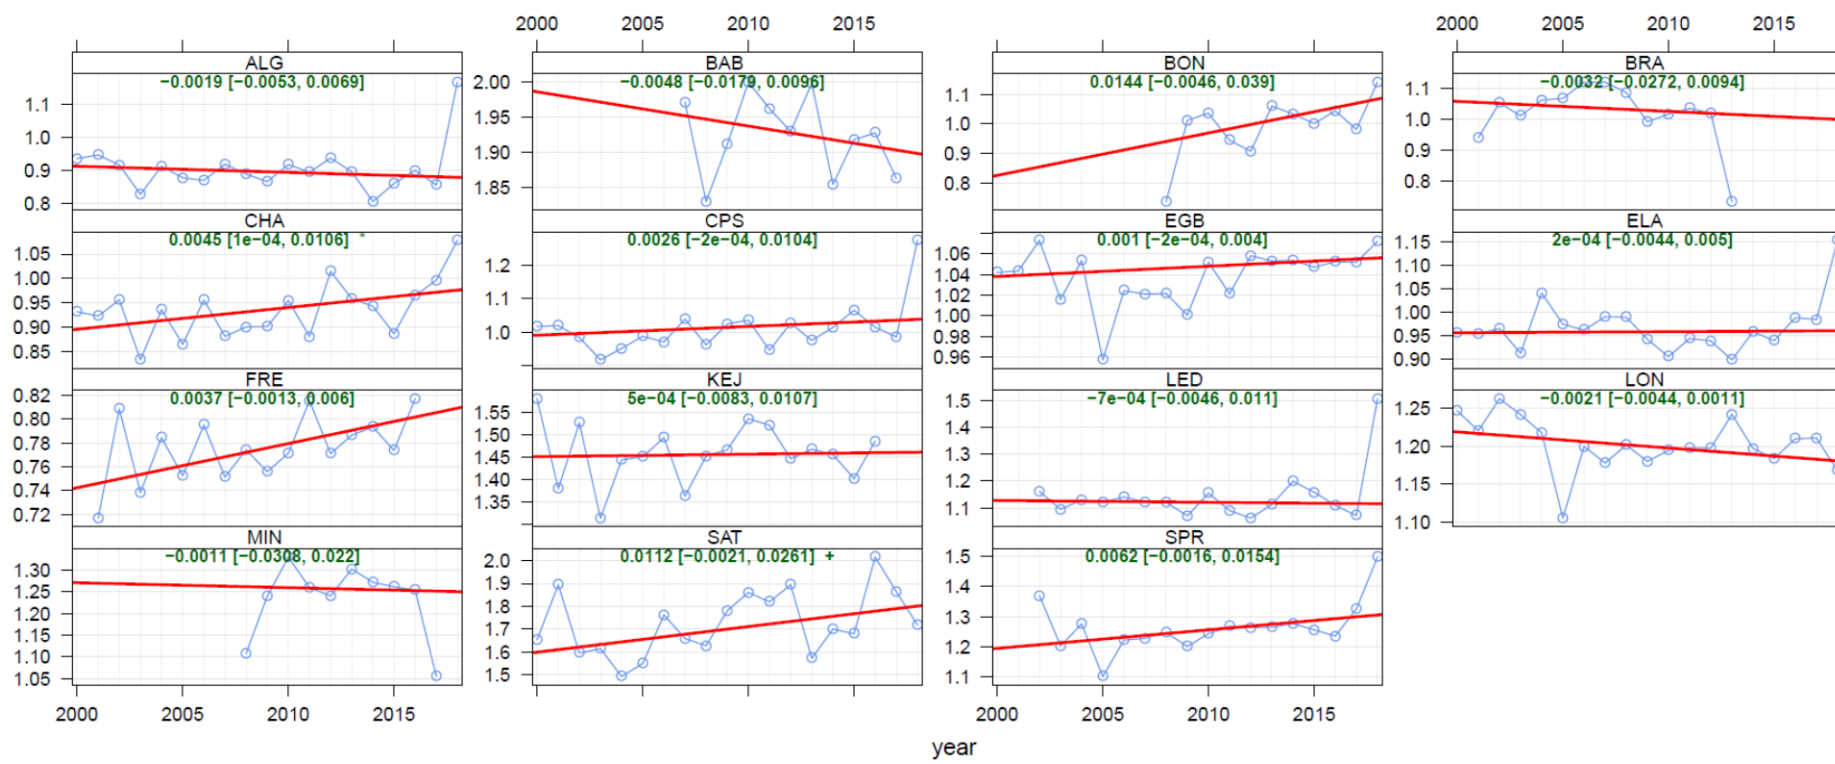

Figure S2 con't -  $V_d$  of  $\text{HNO}_3$  at CAPMoN sites.

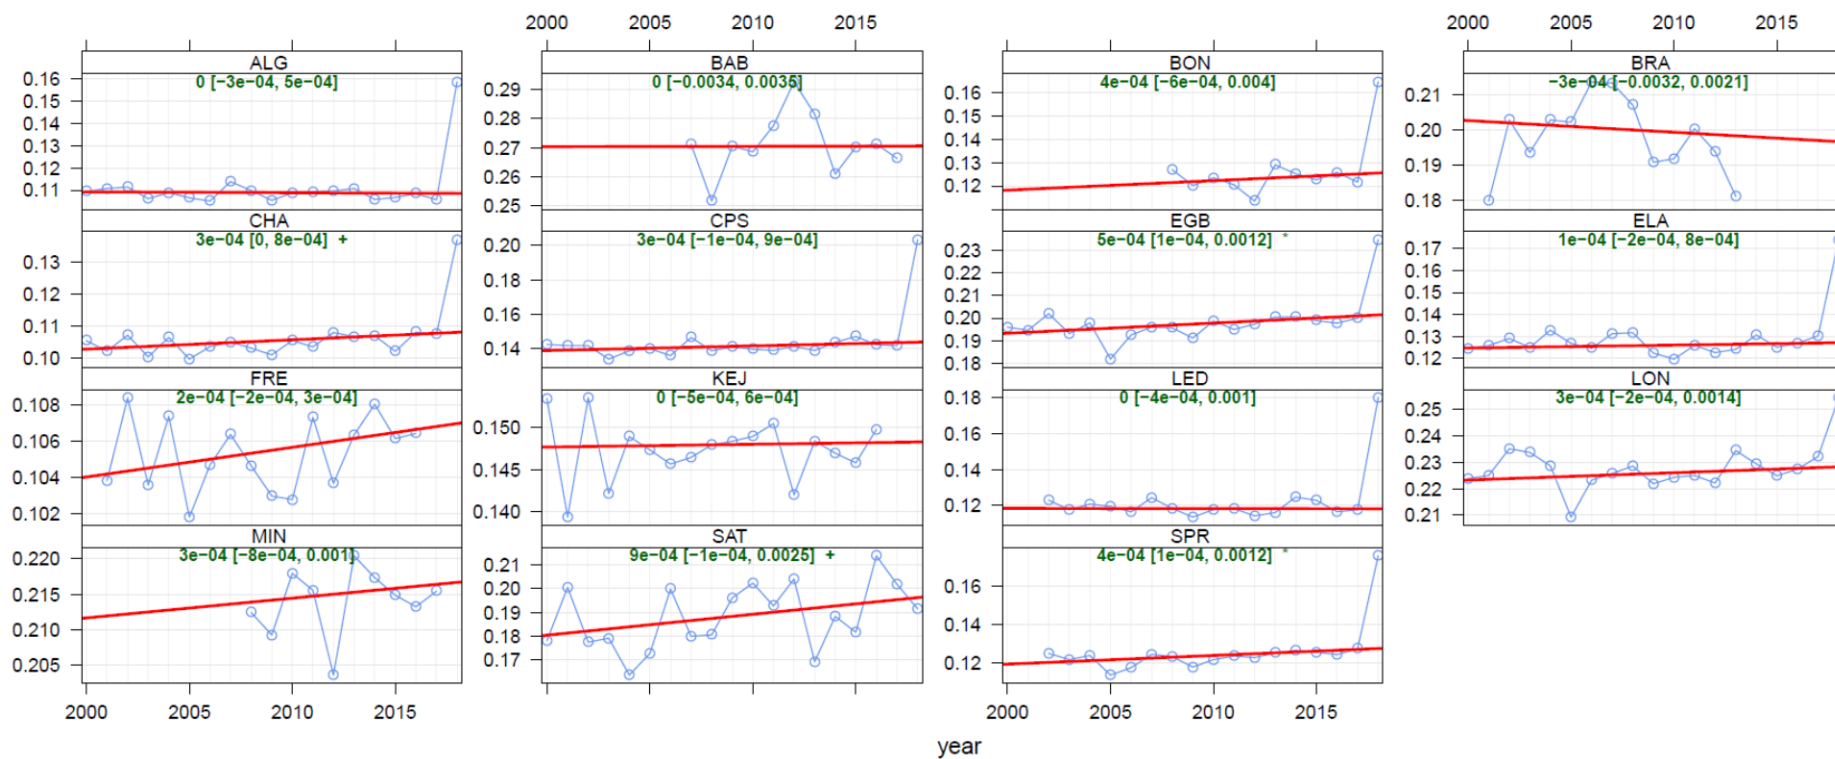

Figure S2 con't -  $V_d$  of  $\text{pSO}_4^{2-}$  at CAPMoN sites.

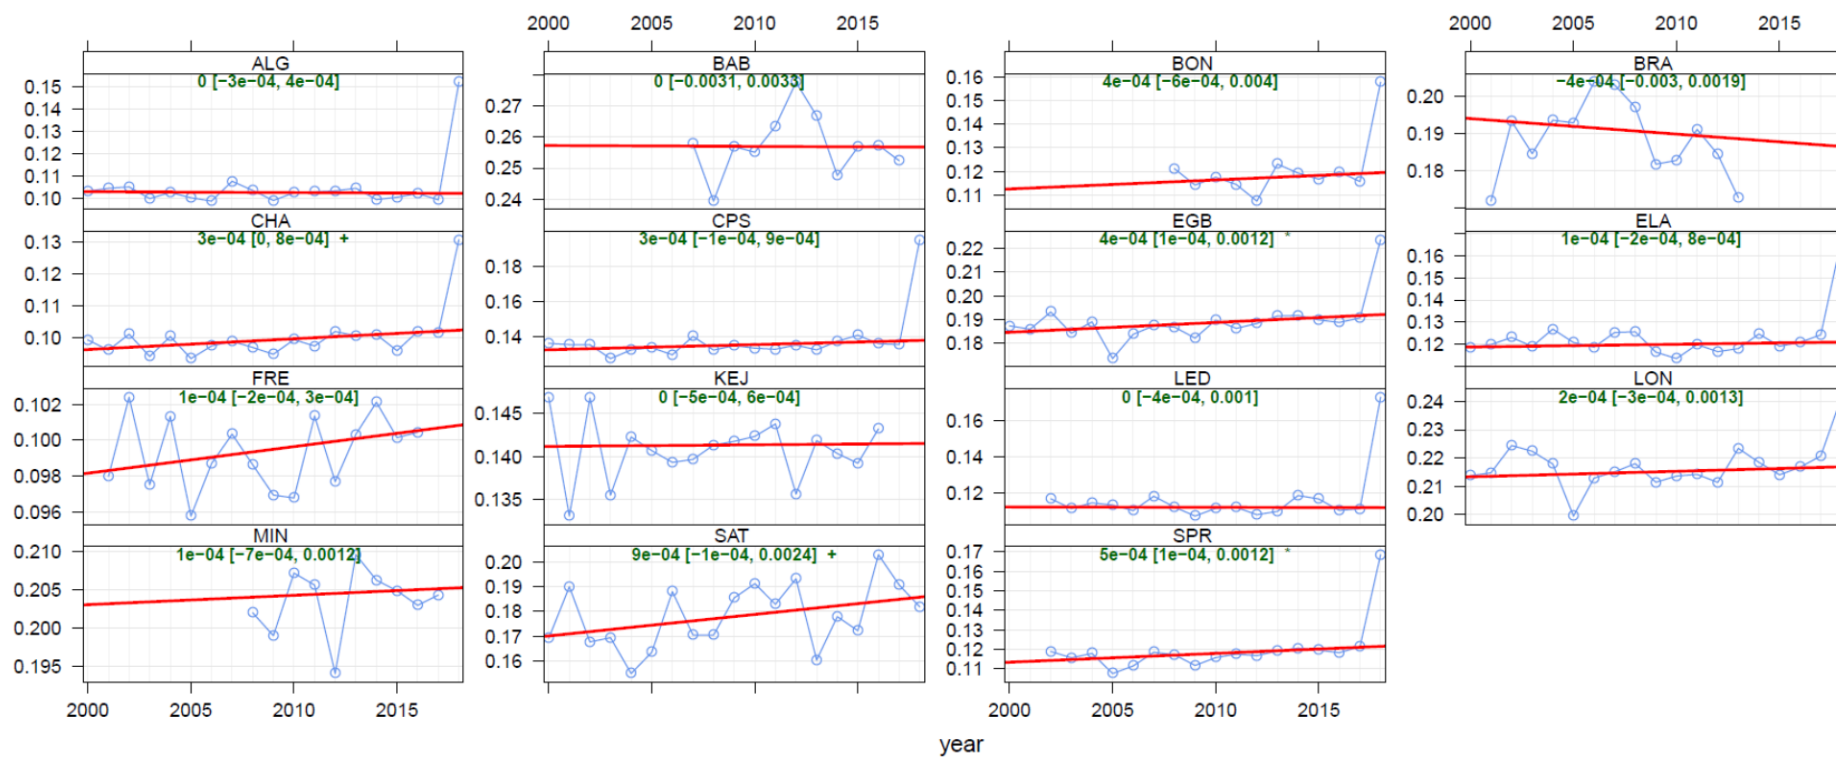

Figure S2 con't -  $V_d$  of  $pNH_4^+$  at CAPMoN sites.

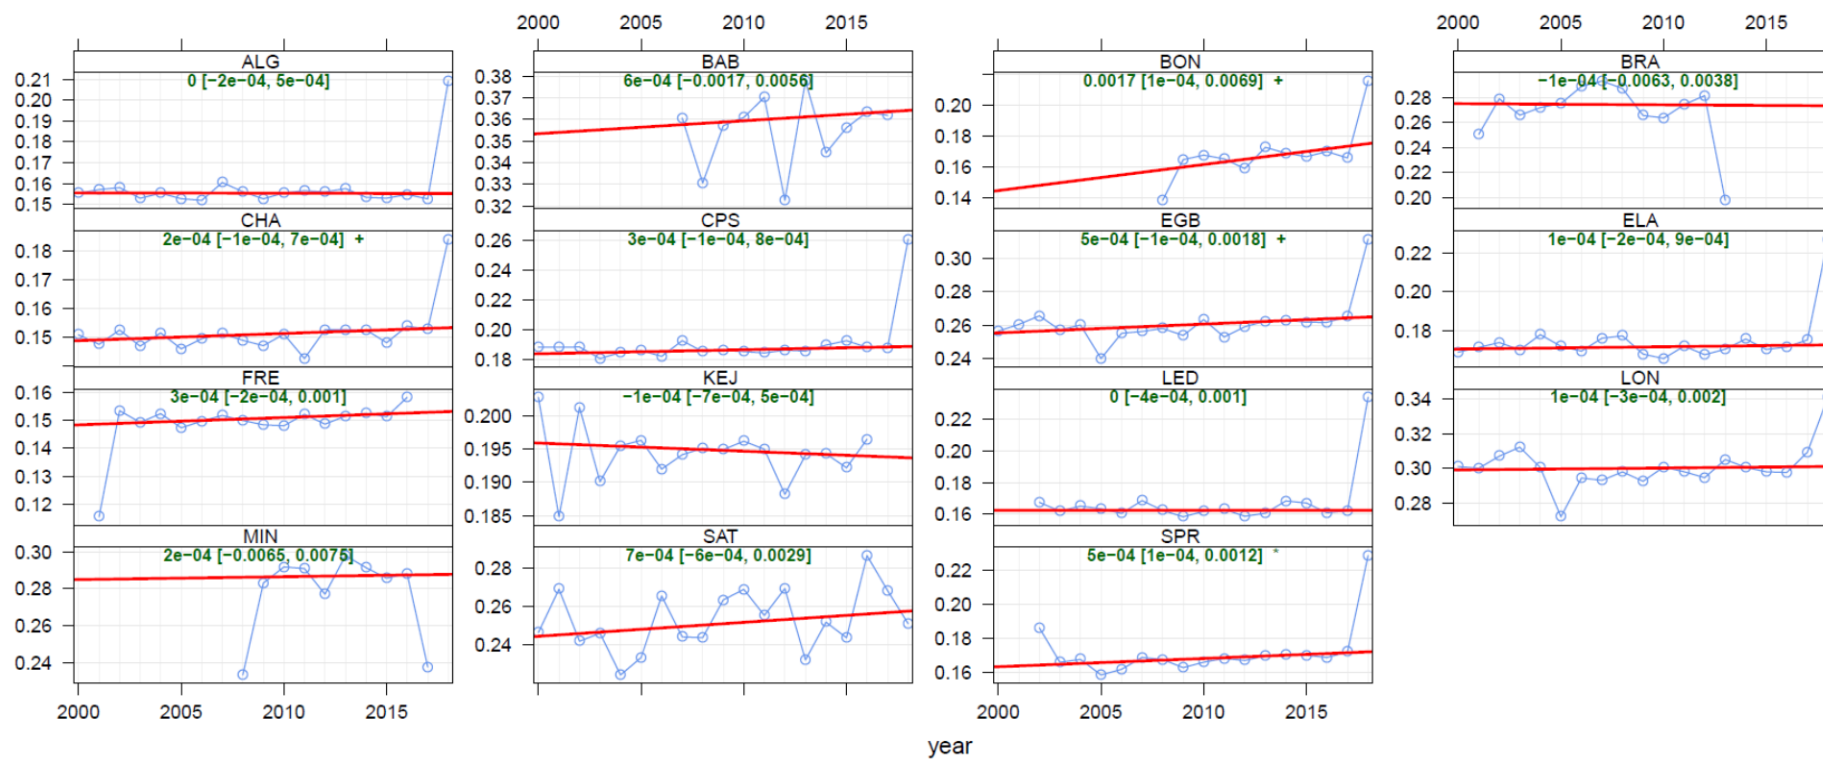

Figure S2 con't -  $V_d$  of  $pNO_3^-$  at CAPMoN sites.

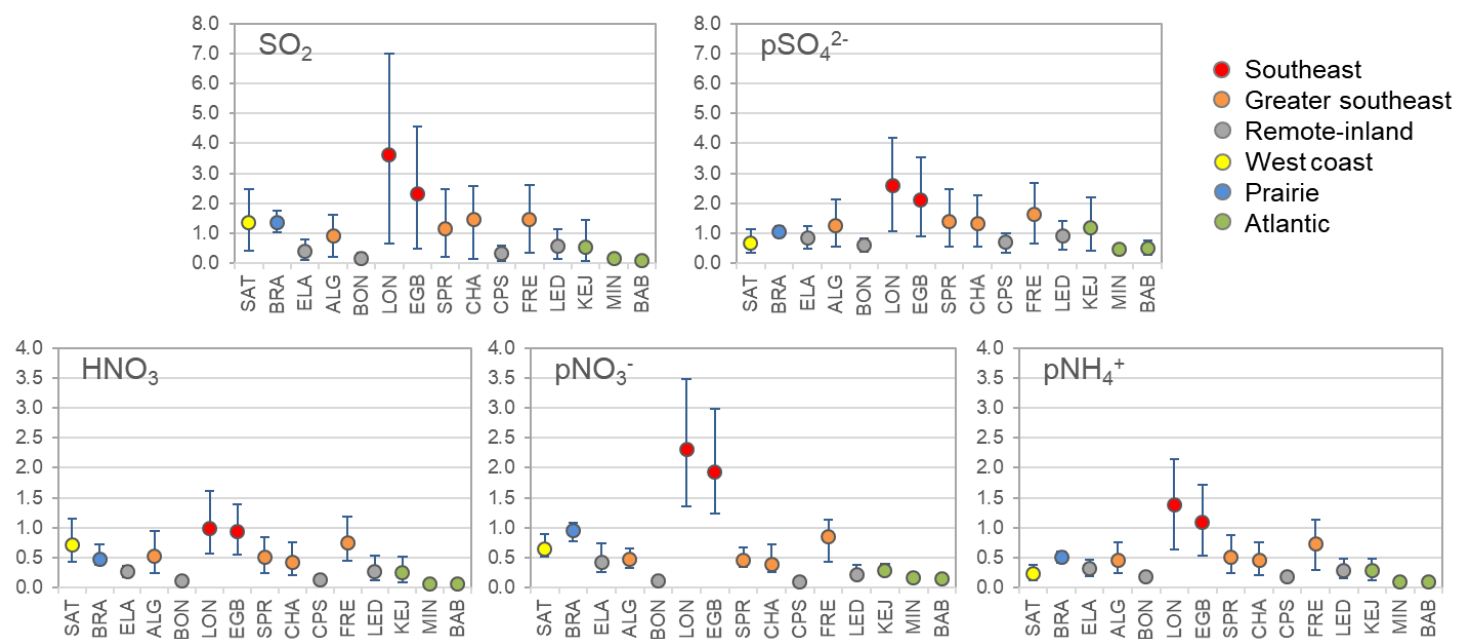

Figure S3: Annual mean of the 24-h integrated atmospheric S and N species concentrations ( $\mu\text{g of ion/m}^3$ ) at CAPMoN sites during the 2000-2018 period. Error bars indicate the range of the annual means. Sites are color-coded by region and arranged in order longitudinally from west to east. Source: ECCC (2021a).



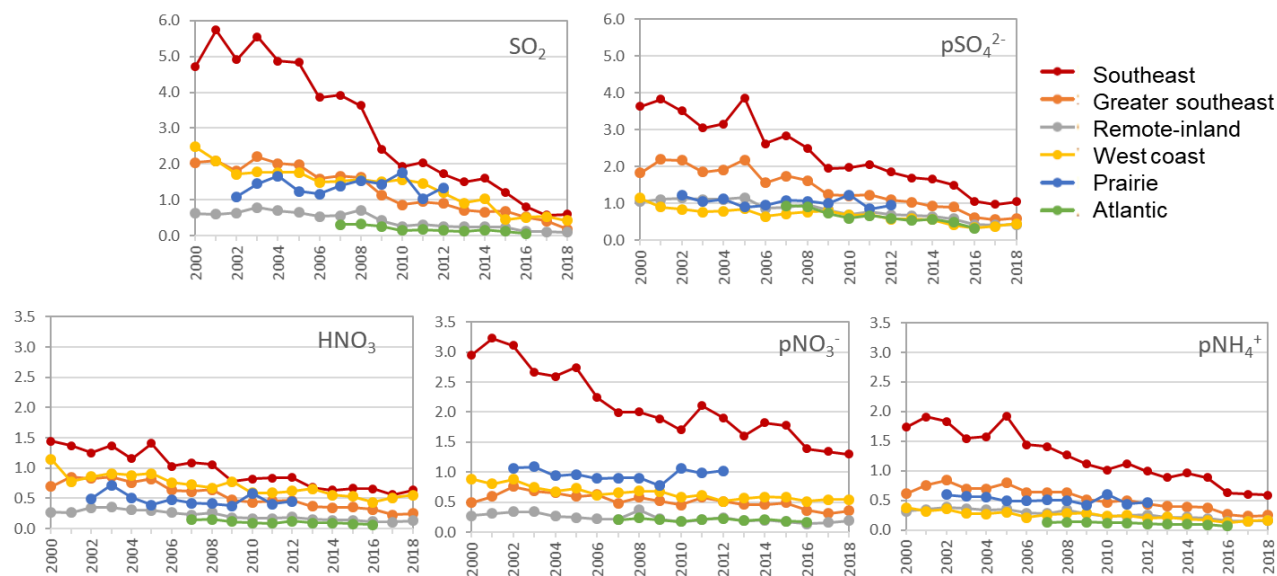

Figure S4: Annual trends in atmospheric S and N species concentrations ( $\mu\text{g of ion}/\text{m}^3$ ) at CAPMoN sites grouped by region. CAPMoN sites belonging to each region are listed as follows. Southeast: EGB, LON; Greater southeast: ALG, SPR, CHA, FRE; Remote-inland: ELA, BON, CPS, LED; West coast: SAT; Prairie: BRA; Atlantic: KEJ, MIN, BAB. Source: ECCC (2021a).

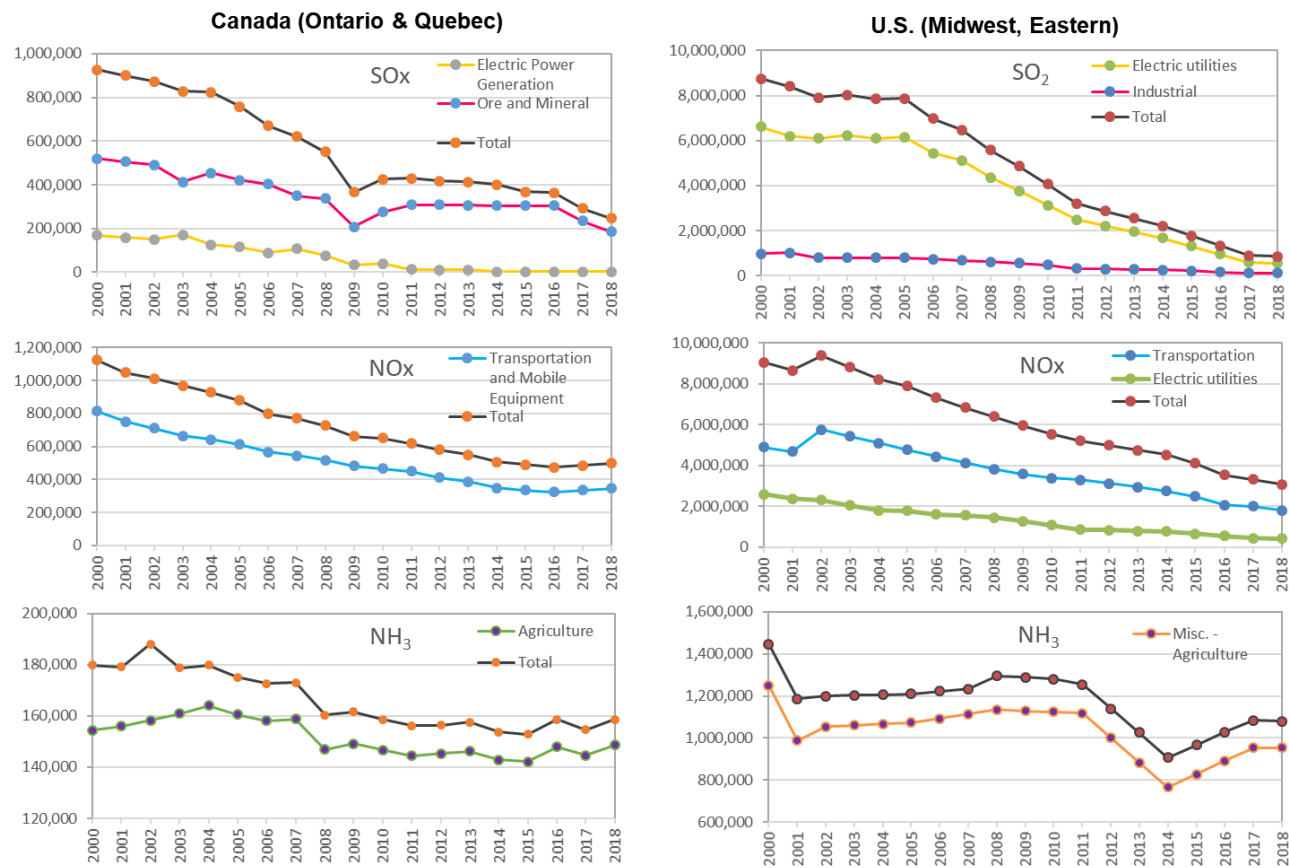

Figure S5a: Annual trends in emissions (tonnes) in provinces of Ontario and Quebec and in Midwest and Eastern U.S. Source: ECCC APEI (2021b) and USEPA (2021).

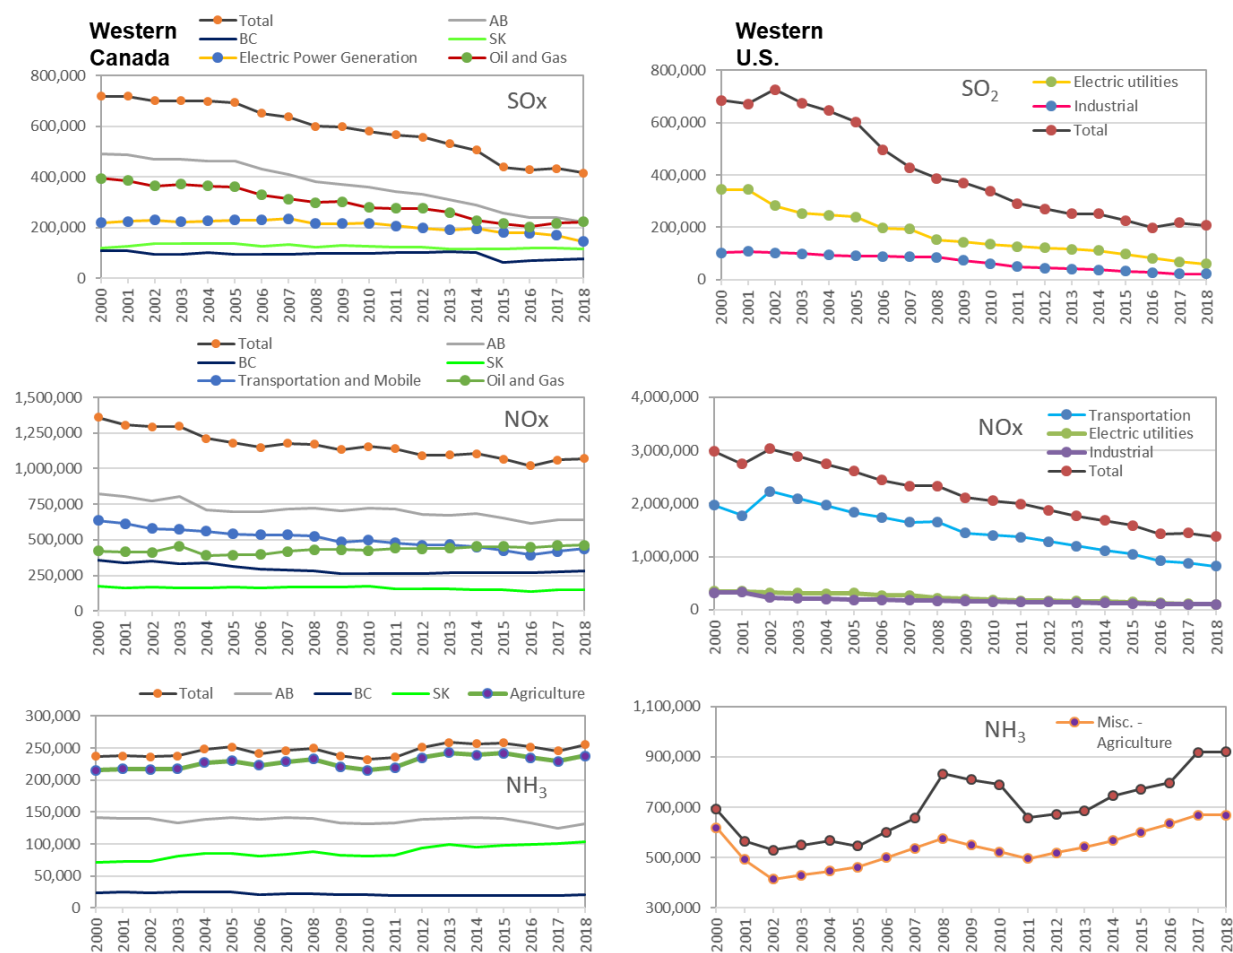

Figure S5b: Annual trends in emissions (tonnes) in provinces of British Columbia, Alberta and Saskatchewan and in Western U.S. Source: ECCCAPEI (2021b) and USEPA (2021).

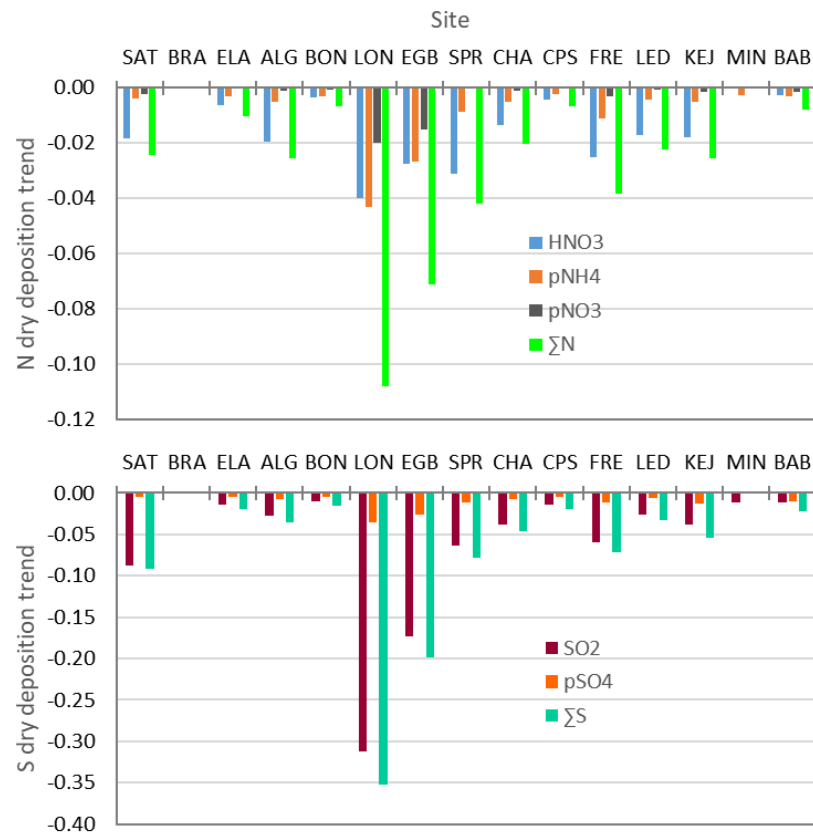

Figure S6: Trends in annual dry deposition fluxes of N and S species (kg N or S/ha/yr) at CAPMoN sites during 2000-2018 based on Theil-Sen slopes (statistically significant at  $p < 0.05$ ). Sites (denoted by site IDs) are plotted longitudinally from left (west) to right (east). Trends for some N or S species were not significant at BRA, ELA, SPR, CPS and MIN. Note:  $\Sigma N$  excludes dry deposition of  $NH_3$  and some oxidized nitrogen species.

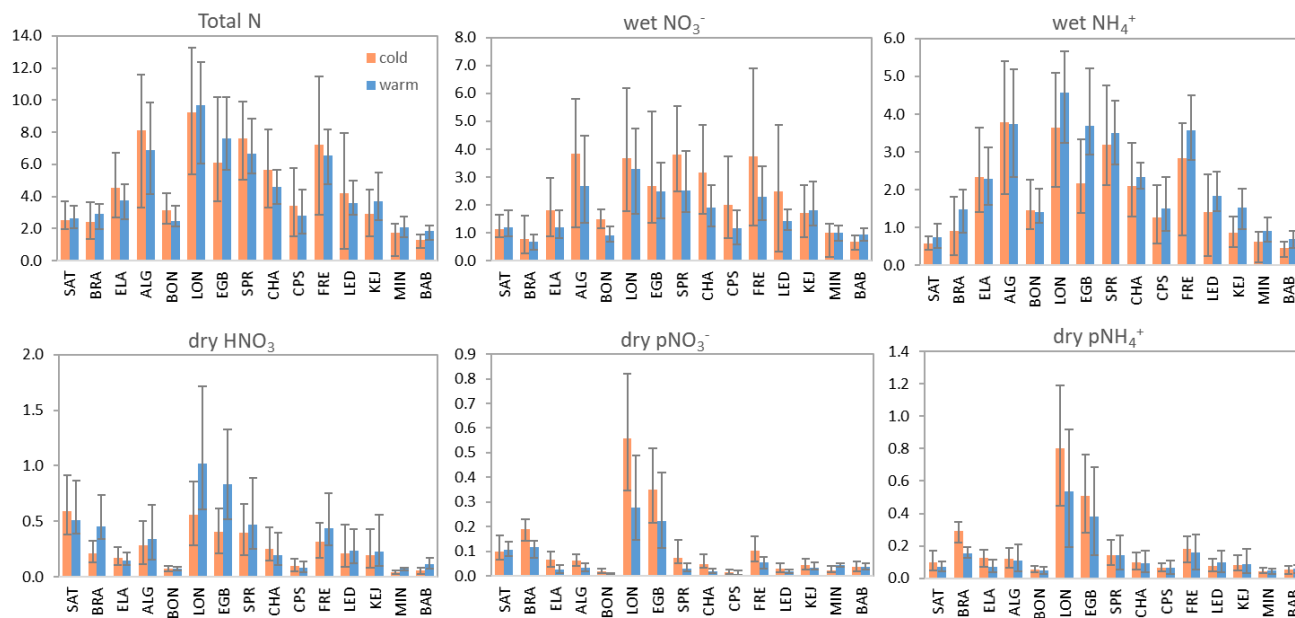

Figure S7: Mean and range of N deposition (kg N/ha/yr) during the cold (Nov-Apr) and warm (May-Oct) seasons during 2000-2018 at CAPMoN sites (denoted by site IDs) plotted longitudinally from left (west) to right (east). Error bars indicate annual variability in seasonal deposition.

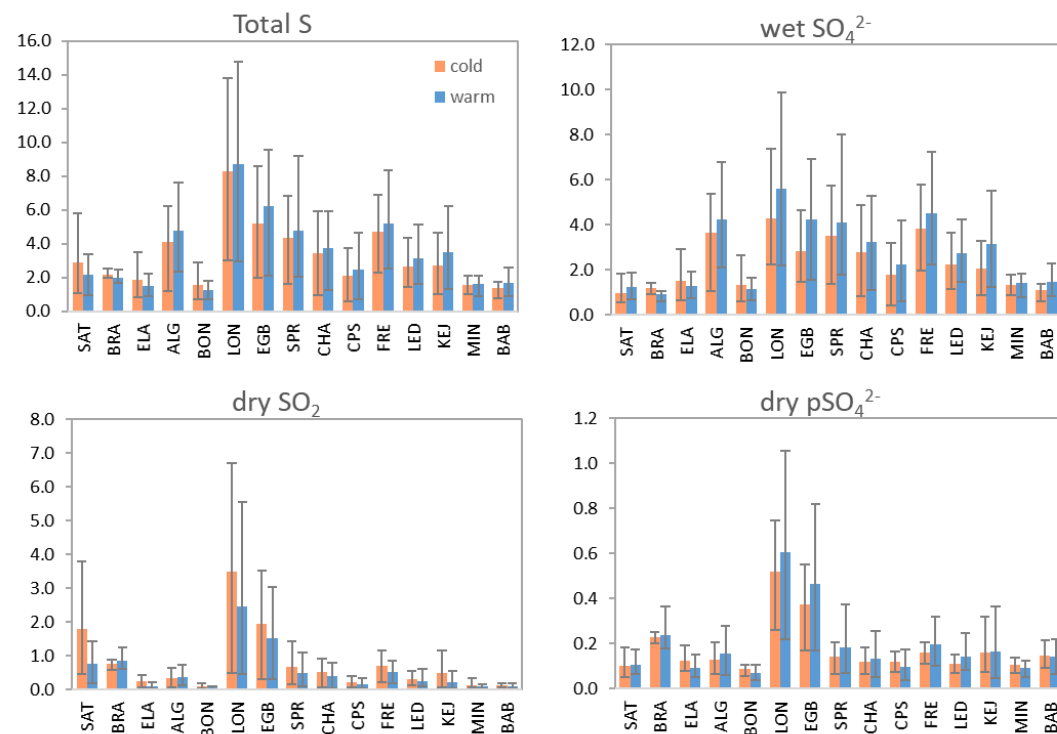

Figure S8: Mean and range of S deposition (kg S/ha/yr) during the cold (Nov-Apr) and warm (May-Oct) seasons during 2000-2018 at CAPMoN sites (denoted by site IDs) plotted longitudinally from left (west) to right (east). Error bars indicate annual variability in seasonal deposition.

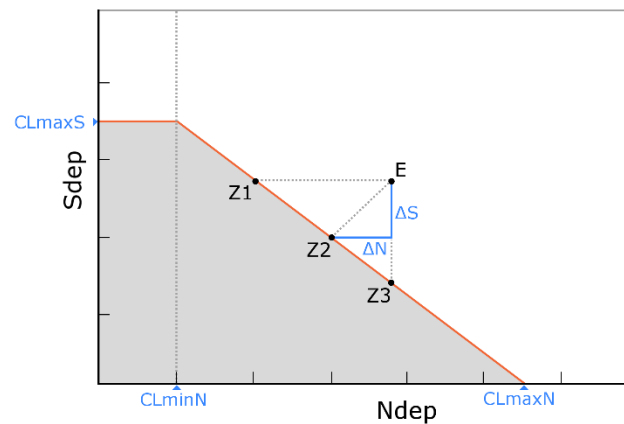

Figure S9: The critical load function for sulfur and nitrogen is defined by the maximum critical load of sulfur when nitrogen deposition ( $N_{dep}$ ) is zero ( $CL_{maxS}$ ), the maximum critical load of nitrogen when sulfur deposition ( $S_{dep}$ ) is zero ( $CL_{maxN}$ ), and a minimum critical load of nitrogen ( $CL_{minN}$ ) above which nitrogen deposition is acidifying. Sites where  $S_{dep}$  and  $N_{dep}$  are below the function line (the grey area) are protected from damage from acid deposition (e.g. not in exceedance). Exceedance (point E) is defined as the shortest path to non-exceedance, as illustrated by the points Z1, Z2, and Z3, but there is no unique path to non-exceedance. For more details see Posch et al. (2015).

### Supplementary Information references

- Beaudoin, A., Bernier, P. Y., Guindon, L., Villemaire, P., Guo, X. J., Stinson, G., Bergeron, T., Magnussen, S., and Hall, R. J.: Mapping attributes of Canada's forests at moderate resolution through kNN and MODIS imagery, *Can. J. For. Res.*, 44(5), 521–532, <https://doi.org/10.1139/cjfr-2013-0401>, 2014.
- Bonten, L. T. C., Reinds, G. J., and Posch, M.: A model to calculate effects of atmospheric deposition on soil acidification, eutrophication and carbon sequestration, *Environ. Model. Softw.*, 79, 75–84, <https://doi.org/10.1016/j.envsoft.2016.01.009>, 2016.
- CCRS: 2010 Land Cover of North America at 250 meters (v2.0), Canada Centre for Remote Sensing (CCRS), Earth Sciences Sector, Natural Resources Canada, <http://www.cec.org/naatlas/>, 2018.
- Centre for Land and Biological Resources Research: Soil Landscapes of Canada, v.2.2, Research Branch, Agriculture and Agri-Food Canada, Ottawa, <https://sis.agr.gc.ca/cansis/nsdb/slc/v2.2/index.html>, 1996.
- CLRTAP: Manual on Methodologies and Criteria for Modelling and Mapping Critical Loads and Levels and Air Pollution Effects, Risks and Trends, CLRTAP, [www.icpmapping.org](http://www.icpmapping.org), 2004.
- Dymond, C. C., Titus, B. D., Stinson, G., and Kurz, W. A.: Future quantities and spatial distribution of harvesting residue and dead wood from natural disturbances in Canada, *For. Ecol. Manag.*, 260(2), 181–192, <https://doi.org/10.1016/j.foreco.2010.04.015>, 2010.
- Environment and Climate Change Canada (ECCC): Major ions and acidifying gases, Government of Canada Open Data Portal, <https://open.canada.ca/data/en/dataset/10ec2a54-9b6d-4dd7-9b05-5c30b9fa4920>, 2021a.
- Environment and Climate Change Canada (ECCC): Canada's Air Pollutant Emissions Inventory (APEI), Government of Canada Open Data Portal, <https://open.canada.ca/data/en/dataset/fa1c88a8-bf78-4fcb-9c1e-2a5534b92131>, 2021b.
- Hengl, T.: Absolute depth to bedrock (in cm) [Dataset], SoilGrids250m, <https://data.isric.org/geonetwork/srv/api/records/f36117ea-9be5-4afd-bb7d-7a3e77bf392a>, 2017.
- Hengl, T.: Long-term MODIS LST day-time and night-time temperatures, sd and differences at 1 km based on the 2000–2017 time series (1.0) [Data set], Zenodo, <https://doi.org/10.5281/zenodo.1435938>, 2018a.



Hengl, T.: Sand content in % (kg / kg) at 6 standard depths (0, 10, 30, 60, 100 and 200 cm) at 250 m resolution (v0.2) [Data set], Zenodo, <https://doi.org/10.5281/zenodo.2525662>, 2018b.

Hengl, T.: Soil bulk density (fine earth) 10 x kg / m-cubic at 6 standard depths (0, 10, 30, 60, 100 and 200 cm) at 250 m resolution (v0.2) [Data set], Zenodo, <https://doi.org/10.5281/zenodo.2525665>, 2018c.

Hengl, T.: Clay content in % (kg / kg) at 6 standard depths (0, 10, 30, 60, 100 and 200 cm) at 250 m resolution (v0.2) [Dataset], Zenodo, <https://doi.org/10.5281/zenodo.2525663>, 2018d.

Hengl, T., and Wheeler, I.: Soil organic carbon content in x 5 g / kg at 6 standard depths (0, 10, 30, 60, 100 and 200 cm) at 250 m resolution (v0.2) [Data set], Zenodo, <https://doi.org/10.5281/zenodo.2525553>, 2018.

Makar, P. A., Akingunola, A., Aherne, J., Cole, A. S., Aklilu, Y., Zhang, J., Wong, I., Hayden, K., Li, S.-M., Kirk, J., Scott, K., Moran, M. D., Robichaud, A., Cathcart, H., Baratzedah, P., Pabla, B., Cheung, P., Zheng, Q., and Jeffries, D. S.: Estimates of exceedances of critical loads for acidifying deposition in Alberta and Saskatchewan, *Atmos. Chem. Phys.*, 18(13), 9897–9927, <https://doi.org/10.5194/acp-18-9897-2018>, 2018.

McKenney, D., Papadopol, P., Campbell, K., Lawrence, K., and Hutchinson, M.: Spatial models of Canada-and North America-wide 1971/2000 minimum and maximum temperature, total precipitation and derived bioclimatic variables. Frontline, forestry research applications, Technical Note, 106, Natural Resources Canada, [www.publications.gc.ca/pub?id=9.559411&sl=1](http://www.publications.gc.ca/pub?id=9.559411&sl=1), 2006.

Pardo, L. H., Duarte, N., Miller, E. K., and Robin-Abbott, M.: Tree chemistry database (version 1.0) (Vol. 324), USDA Forest Service, Northeastern Research Station, 2005.

Paré, D., Bernier, P., Lafleur, B., Titus, B. D., Thiffault, E., Maynard, D. G., and Guo, X.: Estimating stand-scale biomass, nutrient contents, and associated uncertainties for tree species of Canadian forests, *Can. J. For. Res.*, 43(7), 599–608, <https://doi.org/10.1139/cjfr-2012-0454>, 2013.

Posch, M., de Vries, W., Sverdrup, H.: Mass Balance Models to Derive Critical Loads of Nitrogen and Acidity for Terrestrial and Aquatic Ecosystems. In: de Vries, W., Hettelingh, J.P., Posch, M. (eds) *Critical Loads and Dynamic Risk Assessments*, *Environ. Pollut.*, 25, Springer, Dordrecht, [https://doi.org/10.1007/978-94-017-9508-1\\_6](https://doi.org/10.1007/978-94-017-9508-1_6), 2015.

Reinds, G. J., Posch, M., Aherne, J., and Forsius, M.: Assessment of Critical Loads of Sulphur and Nitrogen and Their Exceedances for Terrestrial Ecosystems in the Northern Hemisphere, In W. De Vries, J.-P. Hettelingh, and M. Posch (Eds.), *Critical loads and dynamic risk assessments: Nitrogen, acidity and metals in terrestrial and aquatic ecosystems* (Vol. 25, pp. 403–418), Springer, 2015.

Schut, P., Smith, S., Fraser, W., Geng, X., and Kroetsch, D.: Soil Landscapes of Canada: Building a National Framework for Environmental Information, *GEOMATICA*, 65(3), 293–309, <https://doi.org/10.5623/cig2011-045>, 2011.

Sverdrup, H., and Warfvinge, P.: The effect of soil acidification effect on the growth of trees, grass and herbs, as expressed by the  $(Ca + Mg + K)/Al$  ratio, Reports in ecology and environmental engineering, Department of Chemical Engineering II, Lund University, 1993.

USEPA: Air pollutant emissions trends data, <https://www.epa.gov/air-emissions-inventories/air-pollutant-emissions-trends-data>, 2021.

Zhang, L., Vet, R., O'Brien, J. M., Mihele, C., Liang, Z., and Wiebe, A.: Dry deposition of individual nitrogen species at eight Canadian rural sites. *J. Geophys. Res. Atmos.*, 114, D02301, <https://doi.org/10.1029/2008JD010640>, 2009.

Zhang, L., Vet, R., Wiebe, A., Mihele, C., Sukloff, B., Chan, E., Moran, M. D., and Iqbal, S.: Characterization of the size-segregated water-soluble inorganic ions at eight Canadian rural sites, *Atmos. Chem. Phys.*, 8(23), 7133–7151, 2008.
